# Supplementary material for: Effectiveness-implementation hybrid type 2 trial evaluating two psychoeducational programmes for severe hypoglycaemia in type 1 diabetes: implementation study protocol
Source: PubMed Central journal article supplement — BMJ Open. 2019 Nov 14;9(11):e030370. doi: 10.1136/bmjopen-2019-030370 (PMC6886982; doi:10.1136/bmjopen-2019-030370), 2019-11-14
Supplement: bmjopen-2019-030370.draft_revisions.pdf [file bmjopen-2019-030370.draft_revisions.pdf]

# BMJ Open

BMJ Open is committed to open peer review. As part of this commitment we make the peer review history of every article we publish publicly available.

When an article is published we post the peer reviewers' comments and the authors' responses online. We also post the versions of the paper that were used during peer review. These are the versions that the peer review comments apply to.

The versions of the paper that follow are the versions that were submitted during the peer review process. They are not the versions of record or the final published versions. They should not be cited or distributed as the published version of this manuscript.

BMJ Open is an open access journal and the full, final, typeset and author-corrected version of record of the manuscript is available on our site with no access controls, subscription charges or pay-per-view fees (<http://bmjopen.bmj.com>).

If you have any questions on BMJ Open's open peer review process please email [info.bmjopen@bmj.com](mailto:info.bmjopen@bmj.com)

# BMJ Open

## An effectiveness-implementation hybrid type 2 trial evaluating two psychoeducational programmes for severe hypoglycaemia in type 1 diabetes: Implementation study protocol

|                               |                                                                                                                                                                                                                                                                                                                                                                                                                                                                                                                                                                                                                                |
|-------------------------------|--------------------------------------------------------------------------------------------------------------------------------------------------------------------------------------------------------------------------------------------------------------------------------------------------------------------------------------------------------------------------------------------------------------------------------------------------------------------------------------------------------------------------------------------------------------------------------------------------------------------------------|
| Journal:                      | <i>BMJ Open</i>                                                                                                                                                                                                                                                                                                                                                                                                                                                                                                                                                                                                                |
| Manuscript ID                 | bmjopen-2019-030370                                                                                                                                                                                                                                                                                                                                                                                                                                                                                                                                                                                                            |
| Article Type:                 | Protocol                                                                                                                                                                                                                                                                                                                                                                                                                                                                                                                                                                                                                       |
| Date Submitted by the Author: | 19-Mar-2019                                                                                                                                                                                                                                                                                                                                                                                                                                                                                                                                                                                                                    |
| Complete List of Authors:     | Soukup, Tayana ; King's College London, Health Services and Population Research Department, Centre for Implementation Science<br>Hull, Louise; King's College London<br>Smith, Emma; King's College Hospital NHS Foundation Trust, Diabetes<br>Healey, Andy; King's College London, IOPPN<br>Bakolis, Ioannis; King's College London<br>Amiel, Stephanie; Kings College London School of Medicine, Diabetes, Endocrinology and Internal Medicine<br>Sevdalis, Nick; King's College London,<br>Kendall, Mike; King's College London Division of Diabetes and Nutritional Sciences, Diabetes Research Group, Denmark Hill Campus |
| Keywords:                     | DIABETES & ENDOCRINOLOGY, Protocols & guidelines < HEALTH SERVICES ADMINISTRATION & MANAGEMENT, Diabetes & endocrinology < INTERNAL MEDICINE                                                                                                                                                                                                                                                                                                                                                                                                                                                                                   |
|                               |                                                                                                                                                                                                                                                                                                                                                                                                                                                                                                                                                                                                                                |

SCHOLARONE™  
Manuscripts

# An effectiveness-implementation hybrid type 2 trial evaluating two psychoeducational programmes for severe hypoglycaemia in type 1 diabetes: Implementation study protocol

Tayana Soukup,<sup>a\*</sup> Louise Hull,<sup>a</sup> Emma Smith,<sup>bc</sup> Andy Healey,<sup>a</sup> Ioannis Bakolis,<sup>ad</sup> Stephanie A Amiel,<sup>bc</sup> Nick Sevdalis,<sup>a</sup> PWD Group<sup>e</sup>

## Author affiliations

<sup>a</sup> Centre for Implementation Science, Health Service and Population Research Department, Institute of Psychiatry, Psychology and Neuroscience, King's College London, UK

<sup>b</sup> Department of Diabetes, School of Life Course Sciences, King's College London, UK

<sup>c</sup> Department of Diabetes, King's College Hospital, London UK

<sup>d</sup> Department of Biostatistics and Health Informatics, Institute of Psychiatry, Psychology and Neuroscience, King's College London, London, United Kingdom

<sup>e</sup> People With Diabetes Group: Mr Arthur Durrant, Mr Mike Kendall, Ms Victoria Ruszala, Ms Mel Stephenson, Ms Lis Warren, London UK, E-mail: [mike@everydayupsanddowns.co.uk](mailto:mike@everydayupsanddowns.co.uk) [this is the Patient and Public Involvement Group for the study]

## Full address for correspondence

\*Dr Tayana Soukup, Postdoctoral Research Associate, Centre for Implementation Science,  
Health Service & Population Research Department, King's College London, 16 De Crespigny  
Park, London SE5 8AF. E-mail: [tayana.soukup@kcl.ac.uk](mailto:tayana.soukup@kcl.ac.uk) Telephone: +442078480272

For peer review only

1  
2  
3  
4  
5  
6  
7  
8  
9  
10  
11  
12  
13  
14  
15  
16  
17  
18  
19  
20  
21  
22  
23  
24  
25  
26  
27  
28  
29  
30  
31  
32  
33  
34  
35  
36  
37  
38  
39  
40  
41  
42  
43  
44  
45  
46  
47  
48  
49  
50  
51  
52  
53  
54  
55  
56  
57  
58  
59  
60

## Abstract

**Introduction:** Two of the most acute and feared complications in type 1 diabetes (T1D) are hypoglycaemia and severe hypoglycaemia (SH). While impaired awareness of hypoglycaemia (IAH) can lead to SH with cognitive and motivational barriers implicated, the available education does not integrate behaviour change techniques to address these. A novel Hypoglycemia Awareness Restoration Programme despite optimised care (HARPdoc) is currently being tested against an established Blood Glucose Awareness Training (BGAT) within a parallel, two-arm, group randomised, blinded trial (with its own protocol; NCT02940873) with adults with T1D whose problems with hypoglycaemia and SH have persisted despite otherwise optimised insulin management. While both programmes are aimed at reducing hypoglycaemia, SH and IAH, it is the former that integrates behavior change techniques.

The aim of the current (implementation) study is to evaluate delivery of both HARPdoc and BGAT and explore associations between implementation outcomes and trial endpoints; as well as to develop an evidence-based implementation blueprint to guide implementation, sustainment and scale-up of the effective programmes.

**Methods and analysis:** Stakeholder engagement has underpinned study design and materials to maximise relevance, feasibility, and impact. Guided by the implementation science tools, frameworks, methods and principles, the current study was thus designed through a series of focus groups ( $N=11$ ) with the key intervention stakeholders ( $N=28$ ) - including (i) individuals with lived experience of T1D, IAH and a pilot version of the HARPdoc ( $n=6$ ), and (ii) diabetes healthcare professionals ( $n=22$ ). A mixed methods approach will be utilised throughout.

**Ethics and dissemination:** The protocol has been reviewed and received ethical approval by the Harrow Research Ethics Committee (18/LO/1020; 240752) on October 01, 2018.

## Strengths

- Study design driven by the intervention stakeholders including people with lived experience and the health care professionals
- Study design driven by implementation science theories, models and principles
- Mixed method approach

## Limitations

- Assessments will not be conducted prior to intervention implementation

For peer review only

## Introduction

### Type 1 diabetes and hypoglycaemia

Type 1 diabetes (T1D) is a condition of deficiency of endogenous insulin secretion characterised by hyperglycaemia (blood glucose *above* normal), requiring administration of exogenous insulin for regulation of blood glucose levels.<sup>1</sup> However, one of the most acute and feared complications of the insulin therapy in T1D is *hypoglycaemia* (blood glucose *below* normal), and in particular severe hypoglycaemia (SH), whereby blood glucose is so low that an individual may lose consciousness, or become acutely cognitively impaired to the degree that they are unable to take appropriate glucose treatment to raise their blood glucose and so require someone else to give treatment to them.<sup>2-3</sup> Each year, 22-46% of people with T1D experience SH<sup>4-5</sup> with common presentations including confusion, coma, and seizure.<sup>6-8</sup> SH can lead to mortality: 4-10% of adults with T1D under the age of 40 die as a result of SH.<sup>9-11</sup> In England and Wales alone, this equates to 500-1391 deaths annually,<sup>12-13</sup> as well as 14,387 hospital admissions, 660 day cases and 65,601 bed days (between 2012 and 2013).<sup>14</sup>

A significant factor affecting the successful management of hypoglycaemia in adults with T1D is *impaired awareness of hypoglycaemia* (IAH), that is, reduction in intensity or delayed onset of the physiological symptoms (e.g. dizziness, sweating, palpitations) that serve a vital function of prompting an individual to ingest glucose to raise blood glucose to normal limits. Not surprisingly, thus, IAH is a significant risk factor for SH, and linked to a 6-8-fold increase in the frequency of SH events.<sup>3</sup> Evidence shows that 25-40% of adults with T1D have IAH.<sup>15-16</sup>

*Cognitive and motivational* factors have been found to be associated with *IAH* in a subset of individuals who express low concern for hypoglycaemia and SH, yet they are at high risk of such events.<sup>17-18</sup> Certain cognitions or beliefs, such as normalising the presence of IAH or underestimating the consequences of hypoglycaemia, excessive concern about the possible

1  
2  
3 consequences of hyperglycaemia, and wanting to avoid the sick role have been identified as  
4 barriers to avoiding hypoglycaemia and regaining awareness of associated symptoms.<sup>17-19</sup> The  
5 presence of such beliefs are thought to explain why one third of people with T1D continue to  
6 experience SH and IAH, despite receiving optimal education in insulin self-management.<sup>16</sup>  
7  
8  
9

10  
11  
12  
13 Several education programmes<sup>20</sup> such as the German Diabetes Teaching and Training  
14 Programme (DTTP),<sup>21</sup> and the UK's Beta Cell Education Resources for Training (BERTIE)<sup>22</sup>  
15 and Dose Adjustment for Normal Eating (DAFNE),<sup>23</sup> aim to provide a foundation of  
16 knowledge and skills in flexible and safe insulin management, and in the UK, these are offered  
17 to all adults with T1D. While these programmes do not explicitly focus on IAH or SH, they  
18 provide more general training in diabetes self-management and include information for the  
19 general treatment and prevention of hypoglycaemia.<sup>20</sup> However, improvement in glycaemic  
20 outcomes following completion of such programmes is unclear. For instance, individuals that  
21 have completed DAFNE<sup>23</sup> do not always experience improved or sustained glycaemic  
22 outcomes, indicating that a more targeted approach may be required for individuals who  
23 continue to experience problematic hypoglycaemia despite education on the general  
24 principles.<sup>24</sup>  
25  
26  
27  
28  
29  
30  
31  
32  
33  
34  
35  
36  
37  
38  
39  
40  
41

42 Structured education with specific focus on hypoglycaemia management and avoidance has  
43 therefore been developed, such as, for instance, Blood Glucose Awareness Training (BGAT)<sup>25-</sup>  
44 <sup>30</sup> and self-management-oriented education programme (PRIMAS),<sup>31</sup> which seem to have  
45 similar benefit on hypoglycaemia risk as the more generic programmes, where these have been  
46 specifically compared.<sup>20</sup> Another programme is DAFNE - Hypoglycaemia Awareness  
47 Restoration Training (DAFNE-HART),<sup>32</sup> which was specifically designed to address the on-  
48 going needs of people with T1D who continued to experience severe hypoglycaemia and IAH  
49 after completing DAFNE.<sup>23</sup>  
50  
51  
52  
53  
54  
55  
56  
57  
58  
59  
60



1  
2  
3 DAFNE-HART was based on the research identifying abnormal activation of cortical brain  
4 regions in response to hypoglycaemia in people with IAH and the research identifying low  
5 concern, and unhelpful cognitions about hypoglycaemia among people with IAH.<sup>33</sup> It sought  
6 to address cognitive and motivational barriers associated with IAH and SH, especially in adults  
7 with T1D who continue to experience severe hypoglycaemia despite optimal previous insulin  
8 regimens and educational programmes.<sup>33</sup> However, to further enhance diabetes education, it  
9 has been argued that future programmes should incorporate behaviour change and other  
10 psychologically informed techniques to address cognitive and motivational barriers associated  
11 with IAH and SH.<sup>17,19,20,23</sup>

12  
13 To address this goal, a novel education programme has been further developed from DAFNE-  
14 HART, namely, Hypoglycaemia Awareness Restoration Programme despite optimised care  
15 (HARPdoc), which is currently being tested against the BGAT programme within a parallel,  
16 two-arm, group randomised, blinded clinical trial (with its own detailed protocol;  
17 NCT02940873; aka HARPdoc trial).<sup>33</sup> Both HARPdoc and BGAT are group therapies aimed  
18 at reducing hypoglycaemia, SH and IAH in adults with T1D who are continuing to experience  
19 SH and are being tested in the trial only in people whose problems with hypoglycaemia have  
20 persisted despite otherwise optimised management of their insulin treatment regimens and  
21 educational programmes. For more detail on the two education programmes tested with the  
22 trial and evaluated as part of the implementation, please see the Methods section.

### 23 24 25 **Aim and objectives**

26  
27 The aim of the study is to assess the way in which HARPdoc and BGAT are delivered in the  
28 context of the clinical trial sites, facilitating understanding of the potential link between the  
29 delivery of the programmes under investigation and the expected improvements in SH rates.  
30 This will be achieved in a qualitative, but also quantitative manner which will allow us to

1  
2  
3 explore the relationship between the implementation of the programmes and the clinical trial's  
4  
5 outcomes. Ultimately, this will enable the development of an implementation blueprint to  
6  
7 facilitate future implementation after the trial is completed.  
8  
9

10  
11 The study will address the following research questions for both education programmes from  
12  
13 the perspectives of the intervention stakeholders (including adults with T1D with problematic  
14  
15 hypoglycaemia, their relatives, as well as diabetes physicians, educators, psychologists, and  
16  
17 support staff):  
18  
19

- 20 1. To what extent are the programmes **acceptable, appropriate and feasible**?
- 21 2. To what extent were the programmes **delivered as intended** (*fidelity of delivery*)?
- 22 3. To what extent were the programmes **received as intended** (*fidelity of receipt*)?
- 23 4. How willing are key stakeholders to **adopt** the programmes, and what are the anticipated  
24  
25 facilitators and barriers to adoption?
- 26 5. What are the anticipated facilitators **and barriers to sustainment** of the programmes  
27  
28 long-term (i.e. after the trial is completed)?
- 29 6. What are the **costs** associated with implementing the programmes?
- 30 7. What are **unintended consequences** (positive/negative) associated with programmes?
- 31 8. What are the **contextual enablers and barriers** associated with the **implementation** of  
32  
33 the programmes?
- 34 9. What **implementation strategies** were used within individual sites to improve  
35  
36 implementation of the programmes?
- 37 10. Is there a **relationship between implementation and effectiveness outcomes**?
- 38  
39  
40  
41  
42  
43  
44  
45  
46  
47  
48  
49  
50  
51  
52  
53  
54  
55  
56  
57  
58  
59  
60

## Methods

### Design

The design of our study is an effectiveness-implementation hybrid type 2,<sup>34</sup> placing equal focus on investigating the effectiveness of the two education programmes as part of the HARPdoc trial,<sup>33</sup> while simultaneously investigating the implementation of the programmes as part of the current protocol. We plan to apply a mixed-methods approach incorporating a variety of qualitative and quantitative data collection techniques, including surveys, structured interviews and psychometrically established measurement scales.

The study design was (1) *shaped* by implementation science concepts and frameworks, (2) *refined and informed* by the intervention stakeholders, and (3) *guided* by a tool specifically developed to guide the design of implementation research. In what follows, we describe the design process in more detail.

Firstly, the design was *shaped* by a number of complementary implementation science frameworks that have been selected in light of the aims and objective of the study:

- Medical Research Council (MRC) framework for evaluating complex interventions<sup>35-38</sup> to guide and inform the study design and processes (questions 1 to 10),
- Reach Effectiveness Adoption Implementation Maintenance (RE-AIM) framework<sup>39</sup> to guide selection of implementation outcomes in conjunction with Proctor et al<sup>41</sup> definitions of these outcomes (questions 1 to 7),
- Consolidated Framework for Implementation Research (CFIR)<sup>41-42</sup> to develop semi-structured interview topic guides (see Methods) and subsequently guide the coding and analysis of barriers and facilitators to programme implementation (question 8), and
- Implementation strategies compendium reported by Powel et al<sup>44</sup> (question 9)

1  
2  
3 Second, the design was *refined* by the key intervention stakeholders, including (a) individuals  
4 with lived experience of T1D, hypoglycaemia unawareness and an earlier version of the  
5 HARPdoc, namely, DAFNE-HART (this is the patient and public involvement group for the  
6 study or PWD group), and (b) health care professionals (HCPs) involved in the delivery of the  
7 interventions under investigation. The stakeholders critically reviewed for relevance, feasibility  
8 and clarity a selection of (a) factors commonly assessed and reported in implementation science  
9 research,<sup>39-43</sup> and (b) qualitative and quantitative assessment tools and methods (e.g. surveys  
10 and interview topic guides described in more detail in the *data collection plan* below), and their  
11 measurement time points. Figure 1 shows stakeholder groups involved in the research design  
12 process.  
13  
14  
15  
16  
17  
18  
19  
20  
21  
22  
23  
24  
25

26  
27 -----  
28 **Figure 1: Stakeholder groups involved in the design of the study**  
29 -----  
30

31  
32 Specifically, the outcome measures and materials were presented and reviewed, within an  
33 iterative process of continuous development and refinement, to the key stakeholders ( $N=28$ ),  
34 including the people with lived experience of T1D, IAH and education courses ( $n=6$ ), as well  
35 as the HCPs ( $n=22$ ) across participating diabetes centres (UK=4; US=1) in a series of focus  
36 groups ( $N=11$ ) between October and December 2017. Two 1.5h long sessions were conducted  
37 with same group of representatives of people with T1D, and nine 1h long sessions with different  
38 HCPs. Following each meeting, stakeholders' feedback was incorporated, and the final versions  
39 of the study materials further co-designed and refined. The final selection of the stakeholder-  
40 driven outcome measures, materials and methods (e.g. surveys and interview topic guides)  
41 proposed in this protocol was thus a result of an iterative development process where feedback  
42 from stakeholders fed directly into the development and refinement of the study design (see  
43 Table 1 presented in the *data collection plan* below).  
44  
45  
46  
47  
48  
49  
50  
51  
52  
53  
54  
55  
56  
57  
58  
59  
60

1  
2  
3 Lastly, the Implementation Science Research Development (ImpRes) tool and guide<sup>44</sup> was used  
4 to *guide* the study design and the stakeholder-driven planning process. ImpRes is a newly  
5 developed instrument that helps researchers to design high-quality implementation research,  
6 based on best evidence and expert recommendations. ImpRes is theory-agnostic in that it does  
7 not advocate or require use of a specific implementation framework; rather, ImpRes guides  
8 research teams through the various elements that a well-designed implementations study should  
9 consider, based on current literature and expert inputs. These include: choice of appropriate  
10 frameworks, articulation of patient, service and implementation outcomes and how they are to  
11 be assessed, articulation of the stakeholders of a study, a proforma for the definition of  
12 implementation costs and other elements. Using ImpRes, we were able to:

- 13 • *establish* a set of most relevant and feasible implementation outcome measures (drawing  
14 on Implementation Outcomes taxonomy,<sup>40</sup> implementation strategies,<sup>43</sup> and RE-AIM  
15 framework,<sup>39</sup>
- 16 • *identify the* most relevant and feasible validated surveys for the study,
- 17 • *formulate* instructions to participants for the selected validated pragmatic surveys,
- 18 • *develop* a set of interview topic guides drawing on implementation science frameworks,  
19 including the Implementation Outcomes taxonomy,<sup>40</sup> implementation strategies  
20 taxonomy,<sup>43</sup> RE-AIM framework,<sup>39</sup> and CFIR,<sup>41-42</sup>
- 21 • *identify* appropriate and most relevant participant groups for the study, and
- 22 • *develop* stakeholder-centred participant information sheets and consent forms.

23  
24  
25  
26  
27  
28  
29  
30  
31  
32  
33  
34  
35  
36  
37  
38  
39  
40  
41  
42  
43  
44  
45  
46  
47  
48  
49  
50 Using the ImpRes tool and guide<sup>45</sup> ensured that the study design was (1) informed by  
51 implementation science frameworks, concepts and measures, and (2) informed by key  
52 stakeholders. This process was conducted within the context of a highly intricate study design  
53 of a parallel, two-arm, group randomised, blinded clinical trial where pragmatic considerations  
54 for the current study had to be made (e.g., timelines for evaluating implementation outcomes).

## Setting

This is an international, multisite study based in the UK and US. In the UK, participants will be recruited from 4 diabetes centres, across 4 National Health Service (NHS) Trusts in England – two in the greater London area, one in Dorset and one in South Yorkshire, while in the US from a single diabetes centre in Massachusetts.

## Participants

Stakeholders of the HARPdoc trial<sup>33</sup> and the two educational programmes under investigation (described in detail below) form the participant group of the current study. They include course participants who are people with T1D with problematic hypoglycaemia, relatives of people enrolled in the trial (HARPdoc arm only since it encompasses relative session in Week 6), as well as the diabetes health care professionals (HCPs). People with T1D include participants who were found eligible for the trial and have either (a) fully, or (b) partially attended either one of the two programmes, or (c) have declined and not attended either one of the programmes. The HCPs comprise diabetes educators, physicians, psychologists, and support staff.

## Patient and public involvement

Patient and public involvement group i.e. people with diabetes (PWD) group for the study (as described under the *Design* and in Figure 1) was involved in the development of the study presented in this protocol from the very conception through to the selection of outcomes, design of measures including topic guides, and formulating documents for ethical approval (incl. information sheets and consent forms), as well as this protocol itself. A detailed description of how the PWD group for the study has shaped the design of this study is outlined under the *Design* section, and in Figure 1. The group will also be actively involved in the analysis, write up and subsequent dissemination of the study findings, going forward.

## Trialled educational programmes

The clinical trial testing the effectiveness of the programmes is currently ongoing and blinded (NCT02940873)<sup>33</sup> and therefore, in what follows, we provide only a high-level overview of the programmes (see also Table 1) with detailed information on the curricula purposefully omitted to prevent contamination.

The trial is testing two group programmes – HARPdoc<sup>32-33</sup> and BGAT.<sup>25-30</sup> The former incorporates structured education relevant to hypoglycaemia management, avoidance and strategies to restore hypoglycaemia awareness with behaviour change and psychologically informed techniques aimed to address the cognitive barriers to hypoglycaemia avoidance associated with IAH. It also involves family members in the final session. The curriculum is delivered over 6 weeks in a combination of group and individual sessions facilitated by two experienced diabetes educators, trained to deliver the intervention and supported in its delivery by the study clinical psychologist. The programme was piloted in the DAFNE-HARP study and amended in the light of the experience of that study.<sup>32</sup> A significant and substantial reduction of SH from 10 to 0.5 episodes per year was documented in the pilot study, as well as a significant reduction in worry and improved behavioural avoidance of hyperglycaemia.<sup>32</sup>

The latter is a UK's National Institute for Health and Care Excellence (NICE)<sup>25</sup> recommended programme focused on recognising and reducing both, hypo and hyperglycaemia and empowering people with T1D to anticipate, detect, treat and prevent extremes in blood glucose levels.<sup>25-30</sup> The curriculum is delivered by one experienced diabetes educator, trained in its delivery by one of the clinical psychologists who originally designed it. For the purposes of the trial, the BGAT timetable has been modified to be delivered in the same time frame as the HARPdoc, with the original eight 2 hour sessions delivered over 6 weeks, and as two sessions in one day in weeks 1,2,3 and 6. While BGAT has proved successful in improving glycaemic control, hypoglycaemia awareness,<sup>27</sup> fear of hypoglycaemia,<sup>29</sup> as well as in reducing SH

1  
2  
3 episodes<sup>27-28</sup> from 1.78 to 0.13 as assessed at one-year post-intervention,<sup>28</sup> it has not yet been  
4  
5 tested specifically in people whose SH persists despite exposure to structured education.<sup>27,29</sup>  
6  
7  
8

9  
10 -----  
11 **Table 1:** The structure and delivery of courses  
12 -----

### 13 **Data collection plan**

14  
15 All data collected will be conducted with the view of developing an implementation blueprint  
16 after the trial is completed. As previously described, all implementation outcomes, measures  
17 and methods presented in this protocol have been reviewed for relevance and feasibility and  
18 co-designed with key stakeholders. In what follows, we describe our data collection plan in  
19 relation to the questions we are seeking to address, while in Table 2 below, we provide the final  
20 set of stakeholder-driven implementation outcomes, study design and methods.  
21  
22  
23  
24  
25  
26  
27  
28  
29  
30

31 -----  
32 **Table 2:** Stakeholder-driven data collection plan  
33 -----

34  
35  
36 **Question 1:** To what extent are the programmes **acceptable, appropriate** and **feasible** to key  
37 **intervention stakeholders?**

38  
39  
40 Previously validated pragmatic surveys<sup>45</sup> will be used to assess the acceptability,  
41 appropriateness and feasibility of HARPdoc and BGAT. The surveys will be completed by key  
42 stakeholders, i.e. people with T1D, relatives of people enrolled on HARPdoc and diabetes  
43 HCPs who will assess the degree to which they perceive the programmes acceptable, feasible  
44 and appropriate for diabetes and hypoglycaemia management. In addition, one-to-one semi-  
45 structured interviews with stakeholders will also be conducted. The interviews will  
46 complement the survey data and explore in more detail stakeholders' perceptions and  
47 experiences of HARPdoc and BGAT in terms of acceptability, appropriateness and feasibility.  
48  
49 Both surveys and interviews will occur at one-time point, after the programme completion.  
50  
51  
52  
53  
54  
55  
56  
57  
58  
59  
60



1  
2  
3 **Question 2:** To what extent were programmes **delivered as intended** by diabetes educators  
4  
5 *(fidelity of delivery)*?  
6

7  
8 Relevant sections of audiotapes from both the BGAT and HARPdoc group sessions across each  
9  
10 of the sites will be assessed; this will form the fidelity of delivery part of the study that will be  
11  
12 led by the clinical study team. An observational assessment tool has been adapted and refined  
13  
14 by the clinical study team from the AMIGOS.<sup>43</sup> Two trained and experienced independent raters  
15  
16 will use the tool to assess the delivery of the programmes by the diabetes educators from the  
17  
18 audio recordings of individual sessions across each site.  
19  
20  
21

22  
23 **Question 3:** To what extent were programmes **received as intended** by adults with T1D  
24  
25 *(fidelity of receipt)*?  
26

27  
28 Literature acknowledges patients as active participants in health interventions with the fidelity  
29  
30 of receipt focused on the way the intervention is received by the individuals as highly important  
31  
32 although seldom addressed in health research.<sup>46</sup> We will therefore explore the fidelity of receipt,  
33  
34 i.e. fidelity with which the content of HARPdoc and BGAT is received by the adults with T1D,  
35  
36 as part of the one-to-one semi-structured interview (which will also explore acceptability,  
37  
38 appropriateness and feasibility of the programmes as described above). The participants who  
39  
40 have had a useful exposure to the programmes and have either fully or partly (at least the first  
41  
42 3 days attended) completed one of the programmes will be recruited. We will explore their  
43  
44 views and experience of the programme in relation to the extent they feel able to:  
45  
46  
47

- 48 • *engage* with the programme content and their group,
- 49
- 50 • *understand* the content delivered to them by the diabetes educators, and
- 51
- 52 • *acquire and apply* the programme skills to their everyday management of hypoglycaemia.
- 53

54  
55 This will help advance our knowledge of the programmes in terms of how easy or difficult it is  
56  
57 for individuals to engage with the content, as well as to understand and apply the skills acquired  
58  
59 as part of HARPdoc and BGAT to manage hypoglycaemia.  
60

1  
2  
3 **Question 4: How willing are key stakeholders to adopt the programmes?**  
4

5  
6 As part of the interviews with the key stakeholders (described above in detail), we will explore  
7  
8 the intention to adopt HARPdoc and BGAT from two very specific standpoints. Firstly, from  
9  
10 the perspective of the provider or diabetes HCPs (which is commonly explored in health  
11  
12 research),<sup>40</sup> where the interview will explore the extent to which the provider intends to adopt  
13  
14 the programme (e.g. deliver the programme again or refer people onto such programme) after  
15  
16 the trial is completed.  
17

18  
19  
20 Secondly, we will explore the intention to adopt from the perspective of adults with T1D who  
21  
22 are at the receiving end and active participants in the intervention (far less commonly explored  
23  
24 in research).<sup>40</sup> We plan to explore the extent to which adults with T1D intend to (a) use the  
25  
26 intervention skills in their everyday diabetes management, and (b) use such a programme again  
27  
28 or recommend it to other individuals with T1D and problematic hypoglycaemia.  
29  
30

31  
32  
33 In addition, we plan to interview participants who, although eligible, chose not to take part in  
34  
35 HARPdoc and BGAT. This will allow us to explore reasons that may potentially prevent adults  
36  
37 with T1D and problematic hypoglycaemia in participating in such programmes in future. This  
38  
39 is important in terms of exploring the reach<sup>30</sup> of both interventions (i.e. the absolute number,  
40  
41 proportion, and representativeness of individuals who are willing to participate in a given  
42  
43 initiative).<sup>30</sup>  
44  
45

46  
47 **Question 5: What are the potential facilitators and barriers to sustainment of the**  
48  
49 **programmes long-term after the trial is complete and an effective programme identified?**  
50

51  
52 As part of the one-to-one interview with the key stakeholders (described above in detail), we  
53  
54 will explore potential facilitators and barriers to sustained use of HARPdoc and BGAT after  
55  
56 the trial is completed from the perspectives of providers (i.e. diabetes HCPs) as well as the  
57  
58  
59  
60

1  
2  
3 course participants who are adults with T1D and the relatives of people in the HARPdoc arm  
4  
5 of the trial who attended the last week of the programme.  
6  
7

8  
9 With the providers, the focus will be on understanding the potential facilitators and barriers to  
10  
11 the implementation of HARPdoc and BGAT into the local services after the trial is completed.  
12  
13 In contrast, with the adults with T1D who have either fully or partially completed one of the  
14  
15 programmes as well as the relatives, the focus will be on exploring the potential and experienced  
16  
17 facilitators and barriers to sustained use of knowledge and skills gained in long-term  
18  
19 hypoglycaemia management.  
20  
21  
22

23 **Question 6: What are the costs associated with implementing the programmes to the key**  
24 **stakeholders?**  
25

26  
27  
28 One-to-one interviews with the key stakeholders will also explore costs, in terms of time and  
29  
30 money, associated with implementing HARPdoc and BGAT. With the HCPs, the focus will be  
31  
32 on costs incurred as a result of the delivery, preparation and training in relation to the  
33  
34 programme, while with adults with T1D and the relatives, the focus will be on the costs incurred  
35  
36 attending and completing the programme.  
37  
38  
39

40 **Question 7: Are there any unintended consequences associated with either one of the**  
41 **programmes?**  
42  
43

44  
45 One-to-one interviews with the key stakeholders will also explore any unintended  
46  
47 consequences, both positive and negative, associated with HARPdoc and BGAT. Unintended  
48  
49 consequences will be explored from the perspectives of the HCPs, adults with T1D and their  
50  
51 relatives, in relation to how the programme has impacted on them and the people around them.  
52  
53  
54

55 **Question 8: What are the contextual enablers and barriers associated with the**  
56 **implementation of the programmes?**  
57  
58  
59  
60

1  
2  
3 The contextual enablers and barriers to intervention implementation that stakeholders have  
4 experienced will be explored and assessed in two ways: interviews with the key stakeholders  
5 and meeting minutes between HCPs involved in the trial.  
6  
7  
8  
9

10  
11 *One-to-one interviews* with the key stakeholders (described above) will explore context of  
12 HARPdoc and BGAT in more detail from the perspectives of the HCPs, adults with T1D and  
13 the relatives. They will focus on exploring the factors that facilitated delivery or present a  
14 particular challenge to delivery.  
15  
16  
17  
18  
19

20  
21 *Minutes from meetings* taking place with the HCPs as part of the trial management processes  
22 will be assessed for contextual factors affecting delivery of interventions using qualitative  
23 content analysis. This will help us identify any potential barriers or facilitators to post-trial  
24 adoption, implementation and sustained use of the successful programme.  
25  
26  
27  
28  
29

30  
31 **Question 9: What implementation strategies were used within individual sites to improve**  
32 **the implementation of the programmes?**  
33

34  
35  
36 As part of the one-to-one interviews with the diabetes HCPs (described above), we will explore  
37 and identify implementation strategies (i.e. methods or techniques used to enhance and promote  
38 adoption, implementation and sustainability of an intervention)<sup>43</sup> used within individual sites  
39 during the trial in order to improve delivery and implementation of the programmes. In  
40 addition, we will also explore any potential strategies that may be important to consider by the  
41 local sites wishing to implement HARPdoc and BGAT in future after the trial is completed.  
42  
43  
44  
45  
46  
47  
48  
49

50  
51 **Question 10: What is the relationship between the implementation and effectiveness**  
52 **outcomes of the trial?**  
53

54  
55 Clinical outcome data contain information on the primary outcome i.e., the number of SH  
56 events over the preceding year, as well as at 12 and 24 months' post-course (as recorded in the  
57 anonymised SH recall form), and the secondary outcomes (e.g. hypoglycaemia awareness  
58  
59  
60

1  
2  
3 score) in people with T1D taking part in the programmes. These data will be examined in  
4  
5 relation to the pragmatic implementation outcome (acceptability, feasibility and  
6  
7 appropriateness) survey data. This assessment will enable us to explore the relationship between  
8  
9 the implementation and the effectiveness of the two arms of the trial.  
10  
11  
12

### 13 **Data Analysis**

14  
15  
16 Data will be analysed using quantitative and qualitative approaches.  
17  
18

#### 19 Quantitative analysis

20  
21 Descriptive statistics of survey and clinical trial data will be provided. Parametric and  
22  
23 nonparametric tests will be employed to compare the survey responses between the two arms  
24  
25 of the trial. Random intercept linear, logistic and Poisson regression models (depending on the  
26  
27 distribution of the outcome) will be used to explore the relationship between implementation  
28  
29 data and clinical trial outcome data. Mediation analysis with the use of Structural Equation  
30  
31 Models will also be employed to understand the potential pathways in which implementation  
32  
33 has an impact on the effectiveness of the two suggested education programmes. An  
34  
35 implementation by treatment interaction will be included to allow the effect of implantation to  
36  
37 differ at each arm of the trial. All our models will be controlled for a variety of demographic  
38  
39 and socioeconomic variables. All analyses will be conducted in STATA 14.1.  
40  
41  
42  
43  
44

#### 45 Qualitative analysis

46  
47 Interviews with course participants and HCPs as well as trial's meeting minutes will be  
48  
49 analysed qualitatively, using inductive and deductive content analysis approach until saturation  
50  
51 is reached.<sup>50</sup> We will use the CFIR<sup>40-41</sup> to guide the coding and analysis (i.e. framework  
52  
53 analysis) of interview data to identify barriers and facilitators to the implementation and  
54  
55 sustainment of HARPdoc and BGAT. This approach has been used previously i.e. CFIR has  
56  
57 been applied post-implementation to investigate facilitators and barriers to implementation  
58  
59  
60

1  
2  
3 among stakeholders who had already adopted and implemented an innovation, thus identifying  
4  
5 determinants of implementation post hoc.<sup>40-41</sup> Whilst we are aware that this approach is not  
6  
7 entirely consistent with Damschroder's guidance stipulating that CFIR should be applied pre-  
8  
9 implementation to investigate facilitators/barriers to implementation,<sup>40-41</sup> given the constraints  
10  
11 of conducting the effectiveness-implementation hybrid type 2 where equal focus is placed on  
12  
13 both, implementation and effectiveness, it is not possible to follow this guidance. However, we  
14  
15 strongly believe that our approach is of value in identifying *actual*, rather than *anticipated*,  
16  
17 facilitators and barriers to the implementation and sustainment of HARPdoc and BGAT.  
18  
19

20  
21  
22 In line with Damschroder et al's guidance,<sup>41-42</sup> we plan to link determinants of implementation  
23  
24 to implementation outcomes as part of the quantitative analyses described above where we  
25  
26 propose to link the pragmatic implementation outcome survey data with the trial outcome data  
27  
28 with the logistic and Poisson regression models.  
29  
30

## 31 32 33 **Discussion**

34  
35 This is a stakeholder-driven, mixed-methods, multi-site, international project aimed at  
36  
37 assessing the way in which two education programmes, HARPdoc and BGAT, implemented  
38  
39 within an effectiveness-implementation hybrid type 2 trial are delivered in participating  
40  
41 diabetes centres based in the UK and US. Such evaluation will facilitate understanding of the  
42  
43 association between programme implementation and the trial's end points. In the process, we  
44  
45 will address a specific set of implementation objectives:  
46  
47

- 48  
49 • *understand* the extent to which the programmes are perceived to be acceptable,  
50  
51 appropriate and feasible to key stakeholders,  
52
- 53  
54 • *understand* the extent to which the programmes *are delivered and received as intended*,  
55
- 56  
57 • *identify* contextual enablers and facilitators to the implementation of the programmes,  
58  
59  
60

- *identify* potential barriers and facilitators to sustainment and intention to adopt the programmes long-term after the trial is completed,
- *identify* any unintended consequences and *understand* implementation costs associated with the programmes,
- *identify* strategies used to implement the programmes within the trial, and
- *Identify* potential links between implementation and clinical effectiveness of the programmes.

Such evaluation will also enable us to develop an evidence-based implementation blueprint to help guide the implementation, sustainment and scale up of HARPdoc and/or BGAT after the trial is completed.

The study in this protocol depicts a complex research landscape. It is concerned with evaluating implementation of two educational programmes (i.e., HARPdoc and BGAT) introduced and currently being tested within a parallel, two-arm, group randomised, blinded clinical trial, from the perspectives of multiple key intervention stakeholders (including, the adults with T1D, their relatives, as well as diabetes physicians, educators, psychologists and support staff). Within such a complex landscape, continuous stakeholder engagement is essential to the design of a meaningful implementation project. It is also critical in adequately addressing potential challenges and operational issues early on, thus helping maximise feasibility and relevance, in particular, in relation to the methodological approach and measures, as well as the subsequent data collection.

One such challenge was encountered in relation to the potential pre-intervention assessments. The complexity of assessing programme delivery within a parallel, two-arm, group randomised, blinded trial design means that the opportunity to assess course participants just before the start of the programme when they are fully aware of the arm that they are assigned to is small and dependant on the receipt of the ethical approval (for the implementation). This

1  
2  
3 is further compounded by the methodological issues around surveying or interviewing  
4 programme participants about their views of the programmes while they are being randomly  
5 assigned to one or the other; something that could potentially contaminate the trial. Hence, the  
6 pre-intervention assessments in the current study were not feasible and the primary focus has  
7 been placed on post-intervention measurements.  
8  
9  
10  
11  
12  
13  
14

15 Nonetheless, the current study offers a stakeholder-driven approach to evaluating the  
16 implementation of interventions. It uses mixed methods to assess implementation outcomes  
17 and the delivery of the programmes. The findings will inform the development of an  
18 implementation blueprint and the identification of specific implementation strategies for the  
19 post-trial scale-up of the programme/s into routine services. The findings will also form the  
20 basis for a further trial (likely a hybrid type 3 effectiveness-implementation trial)<sup>34</sup> focused on  
21 evaluating implementation success of a number of different implementation strategies in  
22 scaling up and sustaining the clinically effective intervention following the current trial. Such  
23 developments will in turn contribute to the scientific understanding of methods for evaluating  
24 and implementing complex interventions within a complex organisational structure of a health  
25 care system, thus addressing the gaps on many important methodological and practical issues.  
26  
27  
28  
29  
30  
31  
32  
33  
34  
35  
36  
37  
38  
39  
40  
41

### 42 **Ethics approval and consent to participate**

43  
44 The study described in this protocol has been reviewed and given favourable opinion by the  
45 Harrow Research Ethics Committee (18/LO/1020; 240752) on October 01, 2018. Informed  
46 consent will be sought from all participants. The study will be conducted in accordance with  
47 the Good Clinical Practice and recommendations for physicians involved in research on human  
48 subjects adopted by the 18<sup>th</sup> World Medical Assembly, Helsinki 1964 and later revisions.  
49  
50  
51  
52  
53  
54  
55  
56  
57  
58  
59  
60



## Funding

The funding for this study was supported by the *JDRF* (4-SRA-2017-266-M-N). LH, IB, SA and NS are funded by the *National Institute for Health Research* (NIHR) via the ‘*Collaboration for Leadership in Applied Health Research and Care South London*’ (CLAHRC South London) at King’s College Hospital National Health Service (NHS) Foundation Trust, London, UK. LH and NS are also funded by King’s Improvement Science, which is part of the NIHR CLAHRC South London and comprises a specialist team of improvement scientists and senior researchers based at King’s College London. King’s Improvement Science is funded by King’s Health Partners (Guy’s and St Thomas’ NHS Foundation Trust, King’s College Hospital NHS Foundation Trust, King’s College London and South London and Maudsley NHS Foundation Trust), Guy’s and St Thomas’ Charity, the Maudsley Charity and the Health Foundation. NS is also funded by the South London and Maudsley NHS Foundation Trust. IB is supported by the *NIHR Biomedical Research Centre* at South London and Maudsley NHS Foundation Trust and by the NIHR Collaboration for Leadership in Applied Health Research and Care South London at King’s College Hospital NHS Foundation Trust, King’s College London.

The funding agreements ensured the authors’ independence in designing the study, interpreting the data, writing, and publishing the report. The views expressed are those of the authors and not necessarily those of the NHS, the NIHR or the Department of Health and Social Care.

## Acknowledgements

We would like to thank the patient and representatives of the people with type 1 diabetes, as well as the health care professionals involved, for their time and commitment to the design of this study protocol. The collaborating authors for the people with diabetes (PWD) group are Mr Arthur Durrant, Mr Mike Kendall, Ms Victoria Ruzala, Ms Mel Stephenson, and Ms Lis Warren (London, UK).

## Competing interests

NS is the Director of London Safety & Training Solution Ltd, which provides advisory and training services on safety and quality improvement to hospitals and training programs internationally. TS serves as a consultant to F. Hoffmann-La Roche Ltd Diagnostics providing advisory research services in relation to innovations for multidisciplinary tumor boards. The remaining authors declare that they have no competing interests.

## Authors' contributions

As per International Committee of Medical Journal Editors guidelines, to qualify as an author one should have:

- |                                                                                                                                                                                                                                                 |                                             |
|-------------------------------------------------------------------------------------------------------------------------------------------------------------------------------------------------------------------------------------------------|---------------------------------------------|
| <ul style="list-style-type: none"> <li>made substantial contributions to conception and design, or acquisition of data, or analysis and interpretation of data;</li> </ul>                                                                      | TS, LH, IB, AH,<br>NS, SA, ES, PWD<br>Group |
| <ul style="list-style-type: none"> <li>been involved in drafting the manuscript or revising it critically for important intellectual content;</li> </ul>                                                                                        | TS, LH, IB, AH,<br>NS, SA, ES, PWD<br>Group |
| <ul style="list-style-type: none"> <li>given final approval of the version to be published. Each author should have participated sufficiently in the work to take public responsibility for appropriate portions of the content; and</li> </ul> | TS, LH, IB, AH,<br>NS, SA, ES, PWD<br>Group |
| <ul style="list-style-type: none"> <li>agreed to be accountable for all aspects of the work in ensuring that questions related to the accuracy or integrity of any part of the work are appropriately investigated and resolved.</li> </ul>     | TS, LH, IB, AH,<br>NS, SA, ES, PWD<br>Group |

## List of abbreviations

BERTIE = Beta Cell Education Resources for Training

BGAT = Blood Glucose Awareness Training

CFIR = Consolidated Framework for Implementation Research

DAFNE = Dose Adjustment for Normal Eating

DAFNE HART = Dose Adjustment for Normal Eating Hypoglycaemia Awareness Restoration Training

HARPro = Hypoglycaemia Awareness Restoration Programme despite optimised care

HCP – Health Care Professional

IAH = Impaired Awareness of Hypoglycaemia

MRC = Medical Research Council

NICE = National Institute for Health and Care Excellence

PWD = People With Diabetes

RE-AIM = Reach Effectiveness Adoption Implementation Maintenance

SH = Severe Hypoglycaemia

T1D = Type 1 Diabetes

## References

1. Seaquist ER, Anderson J, Childs B, Cryer P, Dagogo-Jack S, Fish L, Heller SR, Rodriguez H, Rosenzweig J, Vigersky R. Hypoglycemia and diabetes: a report of a workgroup of the American Diabetes Association and the Endocrine Society. *Diabet Care*. 2013;36:1384-95.
2. Wild D, von Maltzahn R, Brohan E, Christensen T, Clauson P, Gonder-Frederick L. A critical review of the literature on fear of hypoglycemia in diabetes: Implications for diabetes management and patient education. *Patient Educ Couns*. 2007;68:10-5.
3. Pedersen-Bjergaard U, Pramming S, Heller SR, Wallace TM, Rasmussen AK, Jørgensen HV, Matthews DR, Hougaard P, Thorsteinsson B. Severe hypoglycaemia in 1076 adult patients with type 1 diabetes: influence of risk markers and selection. *Diabetes Metab Res Rev*. 2004;20:479-86.
4. UK Hypoglycaemia Study Group. Risk of hypoglycaemia in types 1 and 2 diabetes: effects of treatment modalities and their duration. *Diabetologia*. 2007;50:1140-1147.
5. Akram K, Pedersen-Bjergaard U, Carstensen B, Borch-Johnsen K, Thorsteinsson B. Frequency and risk factors of severe hypoglycaemia in insulin-treated Type 2 diabetes: a cross-sectional survey. *Diabet Med*. 2006;23:750-6.
6. Lawton J, Rankin D, Elliott J, Heller SR, Rogers HA, De Zoysa N, Amiel S: Experiences, views, and support needs of family members of people with hypoglycemia unawareness: interview study. *Diabet Care*. 2014;37:109-115.
7. Pedersen-Bjergaard U, Færch L, Allingbjerg ML, Agesen R, Thorsteinsson B. The influence of new European Union driver's license legislation on reporting of severe hypoglycemia by patients with type 1 diabetes. *Diabet Care*. 2015;38:29-33.
8. Diabetes Control and Complications Trial/Epidemiology of Diabetes Interventions and Complications Study Research Group, Jacobson AM, Musen G, Ryan CM, Silvers N, Cleary

- 1  
2  
3 P, Waberski B, Burwood A, Weinger K, Bayless M, Dahms W, Harth J. Long-term effect of  
4 diabetes and its treatment on cognitive function. *N Engl J Med.* 2007;356:1842-52.  
5  
6  
7  
8 9. Patterson CC, Dahlquist G, Harjutsalo V, Joner G, Feltbower RG, Svensson J, Schober E,  
9 Gyürüs E, Castell C, Urbonaitė B, Rosenbauer J, Iotova V, Thorsson AV, Soltész G. Early  
10 mortality in EURODIAB population-based cohorts of type 1 diabetes diagnosed in childhood  
11 since 1989. *Diabetologia.* 2007;50:2439-42.  
12  
13  
14  
15  
16  
17 10. Feltbower RG, Bodansky HJ, Patterson CC, Parslow RC, Stephenson CR, Reynolds C,  
18 McKinney PA. Acute complications and drug misuse are important causes of death for  
19 children and young adults with type 1 diabetes: results from Yorkshire Register of diabetes in  
20 children and young adults. *Diabet Care.* 2008;31:922-6  
21  
22  
23  
24  
25  
26 11. Skrivarhaug T, Bangstad HJ, Stene LC, Sandvik L, Hanssen KF, Joner G. Long-term mortality  
27 in a nationwide cohort of childhood-onset type 1 diabetic patients in Norway. *Diabetologia.*  
28 2006;49:298-305.  
29  
30  
31  
32  
33 12. Huxley RR, Peters SA, Mishra GD, Woodward M: Risk of all-cause mortality and vascular  
34 events in women versus men with type 1 diabetes: a systematic review and meta-analysis.  
35 *Lancet Diabetes Endocrinol.* 2015;3:198-206.  
36  
37  
38  
39  
40 13. The Healthcare Quality Improvement Partnership NDA: National Diabetes Audit 2012–2013  
41 Report 2: Compl Mort. 2015  
42  
43  
44 14. Centre THaSCI: The Health and Social Care Information Centre, Hospital Episode Statistics  
45 for England. Inpatient statistics, 2012-13. 2014.  
46  
47  
48  
49 15. Geddes J, Schopman JE, Zammitt NN, Frier BM: Prevalence of impaired awareness of  
50 hypoglycaemia in adults with Type 1 diabetes. *Diabet Med.* 2008;25:501-504.  
51  
52  
53  
54 16. Hopkins D, Lawrence I, Mansell P, Thompson G, Amiel S, Campbell M, Heller S: Improved  
55 biomedical and psychological outcomes 1 year after structured education in flexible insulin  
56  
57  
58  
59  
60

- 1  
2  
3 therapy for people with type 1 diabetes: the U.K. DAFNE experience. *Diabet Care*.  
4  
5 2012;35:1638-1642.  
6  
7
- 8 17. Rogers HA, de Zoysa N, Amiel SA: Patient experience of hypoglycaemia unawareness in  
9  
10 Type 1 diabetes: are patients appropriately concerned? *Diabet Med*. 2012;29:321-327.  
11  
12
- 13 18. Anderbro T, Gonder-Fredrick L, Bolinder J, Lins P-E, Wredling R, Moberg E, Lisspers J,  
14  
15 Johansson U-B. Fear of hypoglycemia: relationship to hypoglycemic risk and psychological  
16  
17 factors. *Acta Diabetol*. 2015;52(3):581–589.  
18  
19
- 20 19. Rankin D, Elliott J, Heller S, Amiel S, Rogers H, DeZoysa N, Lawton J. Experiences of  
21  
22 hypoglycaemia unawareness amongst people with Type 1 diabetes: A qualitative  
23  
24 investigation. *Chronic Illn*. 2014;10(3):180-91.  
25  
26
- 27 20. Yeoh E, Choudhary P, Nwokolo M, Ayis S, Amiel SA. Interventions that restore awareness  
28  
29 of hypoglycemia in adults with type 1 diabetes: A systematic review and meta-analysis. *Diabet*  
30  
31 *Care*. 2015;38(8):1592-1609.  
32  
33
- 34 21. Muhlhauser I, Jorgens V, Berger M. Bi-centric evaluation of a teaching and treatment  
35  
36 programme for type 1 (insulin-dependent) diabetic patients: improvement of metabolic control  
37  
38 and other measures of diabetes care for up to 22 months. *Diabetologia*. 1983;25:470–476.  
39  
40
- 41 22. BERTIE Type 1 Diabetes Education Programme. <https://www.bertieonline.org.uk/>. Accessed  
42  
43 12 September 2018.  
44  
45
- 46 23. Heller S, Lawton J, Amiel S, Cooke D, Mansell P, Brennan A, et al. Improving management  
47  
48 of Type 1 diabetes in the UK: The Dose Adjustment for Normal Eating (DAFNE) programme  
49  
50 as a research test-bed. A mixed method analysis of the barriers and facilitators to successful  
51  
52 diabetes self-management, a health economic analysis, a cluster RCT of different models of  
53  
54 delivery of an educational intervention and the potential of insulin pumps and additional  
55  
56 educator input to improve outcomes. *Programme Grants Appl Res*. 2014;2(5).  
57  
58  
59  
60

- 1  
2  
3 24. Elliott J, Jacques RM, Kruger J, Campbell MJ, Amiel SA, Mansell P, Speight J, Brennan A,  
4  
5 Heller SR. Substantial reductions in the number of diabetic ketoacidosis and severe  
6  
7 hypoglycaemia episodes requiring emergency treatment lead to reduced costs after structured  
8  
9 education in adults with Type 1 diabetes. *Diabet Med*. 2014;31:847-53.
- 10  
11  
12 25. National Institute for Health and Care Excellence. Type 1 diabetes in adults: diagnosis and  
13  
14 management. Pg. 17 Recommendation 1.3.7.  
15  
16 [https://www.nice.org.uk/guidance/ng17/resources/type-1-diabetes-in-adults-diagnosis-and-  
19  
20 management-1837276469701](https://www.nice.org.uk/guidance/ng17/resources/type-1-diabetes-in-adults-diagnosis-and-<br/>17<br/>18 management-1837276469701). Accessed 12 September 2018.
- 21  
22 26. Broers S, van Vliet KP, le Cessie S, Spinhoven P, van der Ven NC, Radder JK. Blood glucose  
23  
24 awareness training in Dutch type 1 diabetes patients: one-year follow-up. *Neth J Med*.  
25  
26 2005;63(5):164-9.
- 27  
28 27. Kinsley BT, Weinger K, Bajaj M, Levy CJ, Simonson DC, Quigley M, Cox DJ, Jacobson  
29  
30 AM. Blood glucose awareness training and epinephrine responses to hypoglycaemia during  
31  
32 intensive treatment in type 1 diabetes. *Diabet Care*. 1999;22(7):1022-1028.
- 33  
34 28. Schachinger H, Hegar K, Hermanns N, Straumann M, Keller U, Fehm-Wolfsdorf G, Berger  
35  
36 W, Cox D. Randomized controlled clinical trial of Blood Glucose Awareness Training (BGAT  
37  
38 III) in Switzerland and Germany. *J Behav Med*. 2005;28(6):587-94.
- 39  
40 29. Cox DJ, Gonder-Frederick L, Polonsky W, Schlundt D, Kovatchev B, Clarke W: Blood  
41  
42 glucose awareness training (BGAT-2): Long-term benefits. *Diabet Care*. 2001;24:637-642.
- 43  
44 30. Cox D, Gonder- F redrick L, Polonsky W, Schlundt D, Julian D, Clarke W: A multicenter  
45  
46 evaluation of blood glucose awareness training-II. *Diabet Care*. 1995;18:523–528.
- 47  
48 31. Hermanns N, Kulzer B, Ehrmann D, BergisJurgan N, Haak T. The effect of a diabetes  
49  
50 education programme (PRIMAS) for people with type 1 diabetes: results of a randomized  
51  
52 trial. *Diabetes Res Clin Pract*. 2013;102:149–157  
53  
54  
55  
56  
57  
58  
59  
60

- 1  
2  
3  
4  
5  
6  
7  
8  
9  
10  
11  
12  
13  
14  
15  
16  
17  
18  
19  
20  
21  
22  
23  
24  
25  
26  
27  
28  
29  
30  
31  
32  
33  
34  
35  
36  
37  
38  
39  
40  
41  
42  
43  
44  
45  
46  
47  
48  
49  
50  
51  
52  
53  
54  
55  
56  
57  
58  
59  
60
32. de Zoysa N, Rogers H, Stadler M, Gianfrancesco C, Beveridge S, Britneff E, Choudhary P, Elliott J, Heller S, Amiel SA: A psychoeducational program to restore hypoglycemia awareness: the DAFNE-HART pilot study. *Diabet Care*. 2014;37:863-866.
  33. Beyond education: A Hypoglycaemia Awareness Restoration Programme for people with type 1 diabetes and problematic hypoglycaemia persisting despite optimised care. <https://www.harpdoc.org/>. Accessed 12 September 2018.
  34. Curran GM, Bauer M, Mittman B, Pyne JM, Stetler C. Effectiveness-implementation hybrid designs: combining elements of clinical effectiveness and implementation research to enhance public health impact. *Med Care*. 2012;50(30):217-226.
  35. The Medical Research Council. Developing and evaluating complex interventions: new guidance. <https://www.mrc.ac.uk/documents/pdf/complex-interventions-guidance/>
  36. Craig P, Dieppe P, Macintyre S. Developing and evaluating complex interventions: new guidance: MRC. 2008;337:a1655.
  37. Craig P, Dieppe P, Macintyre S, Michie S, Nazareth I, Petticrew M. Developing and evaluating complex interventions: the new medical research council guidance. *Int J Nurs Stud*. 2013;50:587-592;p.591.
  38. Moore GF, Audrey S, Barker M, Bond L, Bonnel C., Hardeman W, Moor L, O’Cathain A, Tinati T., Wight D, Bair J. Process evaluation of complex interventions: Medical Council guidance. *BMJ*, doi:10.1136/bmj.h1258
  39. Harden SM, Smith ML, Ory MG, Smith-Ray R, Estabrooks PA, Glasgow RE. Re-aim in clinical, community, and corporate settings: perspectives, strategies, and recommendations to enhance public health impact. *Front Public Health*. 2018; doi.org/10.3389/fpubh.2018.00071
  40. Proctor E, Silmere H, Raghavan R, Hoymand P, Aarons G, Bunger A, Griffey R, Hensley M. Outcomes for implementation research: conceptual distinctions, measurement challenges, and research agenda. *Adm Policy Ment Health*. 2011;38(2):65-76.



- 1  
2  
3  
4  
5  
6  
7  
8  
9  
10  
11  
12  
13  
14  
15  
16  
17  
18  
19  
20  
21  
22  
23  
24  
25  
26  
27  
28  
29  
30  
31  
32  
33  
34  
35  
36  
37  
38  
39  
40  
41  
42  
43  
44  
45  
46  
47  
48  
49  
50  
51  
52  
53  
54  
55  
56  
57  
58  
59  
60
41. Kirk AM, Kelley C, Yankey N, Birken SA, Abadie B, Damschroder L. A systematic review of the use of the Consolidated Framework for Implementation Research. *Implementation Sci.* 2016;11:72.
  42. Damschroder LJ, Hagedorn HJ. A guiding framework and approach for implementation research in substance use disorders treatment. *Psychol Addict Behav.* 2011;25(2):194.
  43. Powell BJ, Waltz TJ, Chinman MJ, Damschroder LJ, Smith JL, Matthieu MM, Proctor EK, Kirchner JE. A refined compilation of implementation strategies: results from the Expert Recommendations for Implementing Change (ERIC) project. *Implementation Sci.* 2015;10:21.
  44. Implementation Science Research Development (ImpRes) tool and guide. [http://www.kingsimprovementscience.org/files/ImpRes\\_Guide\\_May2018\\_2.pdf](http://www.kingsimprovementscience.org/files/ImpRes_Guide_May2018_2.pdf). Accessed 03 August 2018.
  45. Weiner BJ, Lewis CC, Stanick C, Powell BJ, Dorsey CN, Clary AS, Boynton MH, Halko H. Psychometric assessment of three newly developed implementation outcome measures. *Implement Sci.* 2017;12:108.
  46. Rixon, L, Baron J, McGale N, Lorencatto F, Francis J, Davies A. Methods used to address fidelity of receipt in health intervention research: a citation analysis and systematic review. *BMC Health Serv Res.* 2016;16:663.
  47. Christopher CW, Ingersoll KS. Development and Initial Validation of the Assessment of Motivational Interviewing Groups – Observer Scales (AMIGOS). *Int J Group Psychoth.* 2017;68(1):69-79.
  48. Fereday J, Muir-Cochrane E. Demonstrating rigor using thematic analysis: a hybrid approach of inductive and deductive coding and theme development. *Int J Qual Methods.* 2006;5,1-11.

## Figure Captions

**Figure 1.** Stakeholder groups that informed the design of the study

For peer review only

**Table 1.** Differences and similarities between HARPdoc and BGAT structure and delivery within the trial

| <b>Structure &amp; delivery</b>                 | <b>HARPdoc</b>                                                                                                                                                                                                                                               | <b>BGAT</b>                                                                                                                                                                                                                                  |
|-------------------------------------------------|--------------------------------------------------------------------------------------------------------------------------------------------------------------------------------------------------------------------------------------------------------------|----------------------------------------------------------------------------------------------------------------------------------------------------------------------------------------------------------------------------------------------|
| Programme duration                              | 6 weeks                                                                                                                                                                                                                                                      | 6 weeks                                                                                                                                                                                                                                      |
| Programme structure                             | 4 weekly full-day group sessions, weeks 1, 2, 3 and 6<br>1 weekly one-to-one telephone session in weeks 4 and 5                                                                                                                                              | 8 x 2hr group sessions delivered as 2 sessions delivered in one day in weeks 1, 2, 3 and 6<br>1 optional one-to-one telephone session in either week 4 or 5                                                                                  |
| Group size                                      | 5-10                                                                                                                                                                                                                                                         | 5-10                                                                                                                                                                                                                                         |
| Diabetes centres                                | 4                                                                                                                                                                                                                                                            | 4                                                                                                                                                                                                                                            |
| Number of courses per diabetes centre           | 2 - 4                                                                                                                                                                                                                                                        | 2 – 4                                                                                                                                                                                                                                        |
| Sample size<br>(overall 96 course participants) | Total of 48 course participants<br>4-8 participants per course                                                                                                                                                                                               | Total of 48 course participants<br>4-8 participants per course                                                                                                                                                                               |
| Educator training                               | 3-day workshop (1 day to standardise training in hypoglycaemia prevention, and 2 days to train in behaviour change and psychologically informed strategies)<br>1-day refresher course after first courses;<br>Scheduled supervision by clinical psychologist | 3-day workshop (1 day to standardise training in hypoglycaemia prevention, and 2 days to review and update the curriculum with the clinical psychologist<br>1-day refresher course after first courses;<br>supervision optional (on request) |
| Educators per course                            | 2 educators per course                                                                                                                                                                                                                                       | 1 educator per course                                                                                                                                                                                                                        |
| Programme structure                             | 4 weekly group sessions in weeks 1, 2, 3 and 6<br>2 one-to-one telephone sessions in weeks 4 and 5                                                                                                                                                           | 4 weekly group sessions in weeks 1, 2, 3 and 6<br>1 optional one-to-one telephone session in week 4 or 5                                                                                                                                     |
| Follow-ups                                      | 2h group sessions delivered at 3, 6, and 12 months after the course                                                                                                                                                                                          | None                                                                                                                                                                                                                                         |
| Programme adherence                             | First 3 group sessions, and 1 one-to-one session                                                                                                                                                                                                             | First 3 group sessions                                                                                                                                                                                                                       |

*Note.* BGAT = Blood Glucose Awareness Training (comparator). HARPdoc = Hypoglycaemia Awareness Restoration Programme despite optimised care.

**Table 2.** Data collection plan for the implementation study: assessment objectives, data, instruments, timeline and participants

| #                               | Study outcomes                                            | Definition of the study outcome                                                                                                                                                  | Data type    | Data collection method    | Measurement time-point | Stakeholder groups*                       |
|---------------------------------|-----------------------------------------------------------|----------------------------------------------------------------------------------------------------------------------------------------------------------------------------------|--------------|---------------------------|------------------------|-------------------------------------------|
| <b>IMPLEMENTATION OUTCOMES:</b> |                                                           |                                                                                                                                                                                  |              |                           |                        |                                           |
| 1.                              | Acceptability <sup>41</sup>                               | Extent to which programme is perceived to be agreeable and acceptable for hypoglycaemia and diabetes management.                                                                 | Quantitative | AIM† survey <sup>47</sup> | Post-intervention      | HCPs, people with T1D and their relatives |
|                                 |                                                           |                                                                                                                                                                                  | Qualitative  | Interview                 | Post-intervention      |                                           |
| 2.                              | Appropriateness <sup>41</sup>                             | Extent to which programme is perceived to be fit and relevant for hypoglycaemia and diabetes management.                                                                         | Quantitative | IAM‡ survey <sup>47</sup> | Post-intervention      | HCPs, people with T1D and their relatives |
|                                 |                                                           |                                                                                                                                                                                  | Qualitative  | Interview                 | Post-intervention      |                                           |
| 3.                              | Feasibility <sup>41</sup>                                 | Extent to which programme can be successfully used or carried out to reduce incidents of severe hypoglycaemia.                                                                   | Quantitative | FIM§ survey <sup>47</sup> | Post-intervention      | HCPs, people with T1D and their relatives |
|                                 |                                                           |                                                                                                                                                                                  | Qualitative  | Interview                 | Post-intervention      |                                           |
| 4.                              | Fidelity of delivery <sup>41</sup>                        | Extent to which programme is delivered as intended.                                                                                                                              | Quantitative | Checklist <sup>49</sup>   | Post-intervention      | Diabetes educators and psychologists      |
| 5.                              | Fidelity of receipt <sup>41</sup>                         | Extent to which programme is received as intended.                                                                                                                               | Qualitative  | Interview                 | Post-intervention      | People with T1D                           |
| 6.                              | Adoption <sup>31</sup>                                    | Intention to adopt and use the knowledge and skills learned in the programme in everyday hypoglycaemia and diabetes management.                                                  | Qualitative  | Interview                 | Post-intervention      | HCPs, people with T1D and their relatives |
| 7.                              | Sustainability <sup>41,45-46</sup>                        | Facilitators and barriers to sustained use of the programme.                                                                                                                     | Qualitative  | Interview                 | Post-intervention      | HCPs, people with T1D and their relatives |
| 8.                              | Implementation costs <sup>41,45-46</sup>                  | Costs associated with prospective implementation of the programme.                                                                                                               | Qualitative  | Interview                 | Post-intervention      | HCPs, people with T1D and their relatives |
| <b>OTHER OUTCOMES:</b>          |                                                           |                                                                                                                                                                                  |              |                           |                        |                                           |
| 9.                              | Unintended consequences of programmes <sup>43,45-46</sup> | Positive or negative consequences that are not anticipated at the time of programme implementation.                                                                              | Qualitative  | Interview                 | Post-intervention      | HCPs, people with T1D and their relatives |
| 10.                             | Contextual factors <sup>43,45-46</sup>                    | Facilitators and barriers to the implementation of the programme.                                                                                                                | Qualitative  | Interview                 | Post-intervention      | HCPs, people with T1D and their relatives |
| 11.                             | Implementation strategies <sup>44</sup>                   | Strategies used to deliver and implement the programme; they refer to methods or techniques to enhance and promote adoption, implementation and sustainability of the programme. | Qualitative  | Interview                 | Post-intervention      | HCPs                                      |

Note. \*HCPs = Health Care Professionals incl. diabetes educator, physician, psychologist, and administrative support. †AIM = Acceptability of Intervention Measure; ‡IAM = Intervention Appropriateness Measure; §FIM = Feasibility of Intervention Measure.<sup>47</sup>

1  
2  
3  
4  
5  
6  
7  
8  
9  
10  
11  
12  
13  
14  
15  
16  
17  
18  
19  
20  
21  
22  
23  
24  
25  
26  
27  
28  
29  
30  
31  
32  
33  
34  
35  
36  
37  
38  
39  
40  
41  
42  
43  
44  
45  
46  
47  
48  
49  
50  
51  
52  
53  
54  
55  
56  
57  
58  
59  
60

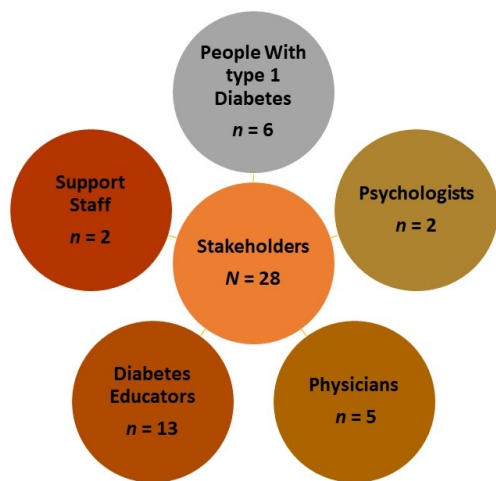

Stakeholder groups that informed the design of the study

338x190mm (96 x 96 DPI)

# BMJ Open

## An effectiveness-implementation hybrid type 2 trial evaluating two psychoeducational programmes for severe hypoglycaemia in type 1 diabetes: Implementation study protocol

|                                 |                                                                                                                                                                                                                                                                                                                                                                                                                                                                                                                                                                                                                                |
|---------------------------------|--------------------------------------------------------------------------------------------------------------------------------------------------------------------------------------------------------------------------------------------------------------------------------------------------------------------------------------------------------------------------------------------------------------------------------------------------------------------------------------------------------------------------------------------------------------------------------------------------------------------------------|
| Journal:                        | <i>BMJ Open</i>                                                                                                                                                                                                                                                                                                                                                                                                                                                                                                                                                                                                                |
| Manuscript ID                   | bmjopen-2019-030370.R1                                                                                                                                                                                                                                                                                                                                                                                                                                                                                                                                                                                                         |
| Article Type:                   | Protocol                                                                                                                                                                                                                                                                                                                                                                                                                                                                                                                                                                                                                       |
| Date Submitted by the Author:   | 13-Aug-2019                                                                                                                                                                                                                                                                                                                                                                                                                                                                                                                                                                                                                    |
| Complete List of Authors:       | Soukup, Tayana ; King's College London, Health Services and Population Research Department, Centre for Implementation Science<br>Hull, Louise; King's College London<br>Smith, Emma; King's College Hospital NHS Foundation Trust, Diabetes<br>Healey, Andy; King's College London, IOPPN<br>Bakolis, Ioannis; King's College London<br>Amiel, Stephanie; Kings College London School of Medicine, Diabetes, Endocrinology and Internal Medicine<br>Sevdalis, Nick; King's College London,<br>Kendall, Mike; King's College London Division of Diabetes and Nutritional Sciences, Diabetes Research Group, Denmark Hill Campus |
| <b>Primary Subject Heading</b>: | Diabetes and endocrinology                                                                                                                                                                                                                                                                                                                                                                                                                                                                                                                                                                                                     |
| Secondary Subject Heading:      | Diabetes and endocrinology, Health services research                                                                                                                                                                                                                                                                                                                                                                                                                                                                                                                                                                           |
| Keywords:                       | DIABETES & ENDOCRINOLOGY, Protocols & guidelines < HEALTH SERVICES ADMINISTRATION & MANAGEMENT, Diabetes & endocrinology < INTERNAL MEDICINE                                                                                                                                                                                                                                                                                                                                                                                                                                                                                   |
|                                 |                                                                                                                                                                                                                                                                                                                                                                                                                                                                                                                                                                                                                                |

SCHOLARONE™  
Manuscripts

# An effectiveness-implementation hybrid type 2 trial evaluating two psychoeducational programmes for severe hypoglycaemia in type 1 diabetes: Implementation study protocol

Tayana Soukup,<sup>a\*</sup> Louise Hull,<sup>a</sup> Emma Smith,<sup>bc</sup> Andy Healey,<sup>a</sup> Ioannis Bakolis,<sup>ad</sup> Stephanie A Amiel,<sup>bc</sup> Nick Sevdalis,<sup>a</sup> Mike Kendall for PWD Group<sup>e</sup>

## Author affiliations

<sup>a</sup> Centre for Implementation Science, Health Service and Population Research Department, Institute of Psychiatry, Psychology and Neuroscience, King's College London, UK

<sup>b</sup> Department of Diabetes, School of Life Course Sciences, King's College London, UK

<sup>c</sup> Department of Diabetes, King's College Hospital, London UK

<sup>d</sup> Department of Biostatistics and Health Informatics, Institute of Psychiatry, Psychology and Neuroscience, King's College London, London, United Kingdom

<sup>e</sup> People With Diabetes Group: Mr Arthur Durrant, Mr Mike Kendall, Ms Victoria Ruszala, Ms Mel Stephenson, Ms Lis Warren, London UK [Patient & Public Involvement Group for the study]

## Full address for correspondence

\*Dr Tayana Soukup, Postdoctoral Researcher, Centre for Implementation Science, Health Service  
& Population Research Department, King's College London, 16 De Crespigny Park, London SE5  
8AF. E-mail: [tayana.soukup@kcl.ac.uk](mailto:tayana.soukup@kcl.ac.uk) Telephone: +442078480272

For peer review only



1  
2  
3  
4  
5  
6  
7  
8  
9  
10  
11  
12  
13  
14  
15  
16  
17  
18  
19  
20  
21  
22  
23  
24  
25  
26  
27  
28  
29  
30  
31  
32  
33  
34  
35  
36  
37  
38  
39  
40  
41  
42  
43  
44  
45  
46  
47  
48  
49  
50  
51  
52  
53  
54  
55  
56  
57  
58  
59  
60

## Abstract

**Introduction:** Two of the most acute and feared complications in type 1 diabetes (T1D) are hypoglycaemia and severe hypoglycaemia (SH). While impaired awareness of hypoglycaemia (IAH) can lead to SH with cognitive and motivational barriers implicated, the available education does not integrate behaviour change techniques to address these. A novel Hypoglycemia Awareness Restoration Programme despite optimised care (HARPdoc) is currently being tested against an established Blood Glucose Awareness Training (BGAT) within a parallel, two-arm, group randomised, blinded trial (with its own protocol; NCT02940873) with adults with T1D whose problems with hypoglycaemia and SH have persisted despite otherwise optimised insulin management. While both programmes are aimed at reducing hypoglycaemia, SH and IAH, it is the former that integrates behavior change techniques.

The aim of the current (implementation) study is to evaluate delivery of both HARPdoc and BGAT and explore associations between implementation outcomes and trial endpoints; as well as to develop an evidence-based implementation blueprint to guide implementation, sustainment and scale-up of the effective programmes.

**Methods and analysis:** Guided by the implementation science tools, frameworks, methods and principles, the current study were designed through a series of focus groups ( $N=11$ ) with the key intervention stakeholders ( $N=28$ ) - including (i) individuals with lived experience of T1D, IAH and a pilot version of the HARPdoc ( $n=6$ ), and (ii) diabetes healthcare professionals ( $n=22$ ). A mixed methods approach will be utilised throughout. Stakeholder engagement has underpinned study design and materials to maximise relevance, feasibility, and impact.

**Ethics and dissemination:** The protocol has been reviewed and received ethical approval by the Harrow Research Ethics Committee (18/LO/1020; 240752) on October 01, 2018. The findings will be submitted to a peer-reviewed journal and presented at scientific meetings.

## Strengths

- Study design driven by the intervention stakeholders including people with lived experience and the health care professionals
- Study design driven by implementation science theories, models and principles
- Mixed method approach

## Limitations

- Assessments will not be conducted prior to intervention implementation

For peer review only

## Introduction

### Type 1 diabetes and hypoglycaemia

Type 1 diabetes (T1D) is a condition of deficiency of endogenous insulin secretion characterised by hyperglycaemia (blood glucose *above* normal), requiring administration of exogenous insulin for regulation of blood glucose levels.<sup>1</sup> However, one of the most acute and feared complications of the insulin therapy in T1D is *hypoglycaemia* (blood glucose *below* normal), and in particular severe hypoglycaemia (SH), whereby blood glucose is so low that an individual may lose consciousness, or become acutely cognitively impaired to the degree that they are unable to take appropriate glucose treatment to raise their blood glucose and so require someone else to give treatment to them.<sup>2-3</sup> Each year, 22-46% of people with T1D experience SH<sup>4-5</sup> with common presentations including confusion, coma, and seizure.<sup>6-8</sup> SH can lead to mortality: 4-10% of adults with T1D under the age of 40 die as a result of SH.<sup>9-11</sup> In England and Wales alone, this equates to 500-1391 deaths annually,<sup>12-13</sup> as well as 14,387 hospital admissions, 660 day cases and 65,601 bed days (between 2012 and 2013).<sup>14</sup>

A significant factor affecting the successful management of hypoglycaemia in adults with T1D is *impaired awareness of hypoglycaemia* (IAH), that is, reduction in intensity or delayed onset of the physiological symptoms (e.g. dizziness, sweating, palpitations) that serve a vital function of prompting an individual to ingest glucose to raise blood glucose to normal limits. Not surprisingly, thus, IAH is a significant risk factor for SH, and linked to a 6-8-fold increase in the frequency of SH events.<sup>3</sup> Evidence shows that 25-40% of adults with T1D have IAH.<sup>15-16</sup>

*Cognitive and motivational* factors have been found to be associated with *IAH* in a subset of individuals who express low concern for hypoglycaemia and SH, yet they are at high risk of such events.<sup>17-18</sup> Certain cognitions or beliefs, such as normalising the presence of IAH or underestimating the consequences of hypoglycaemia, excessive concern about the possible

1  
2  
3 consequences of hyperglycaemia, and wanting to avoid the sick role have been identified as  
4 barriers to avoiding hypoglycaemia and regaining awareness of associated symptoms.<sup>17-19</sup> The  
5 presence of such beliefs are thought to explain why one third of people with T1D continue to  
6 experience SH and IAH, despite receiving optimal education in insulin self-management.<sup>16</sup>  
7  
8  
9  
10

11  
12  
13 Several education programmes<sup>20</sup> such as the German Diabetes Teaching and Training  
14 Programme (DTTP),<sup>21</sup> and the UK's Beta Cell Education Resources for Training (BERTIE)<sup>22</sup>  
15 and Dose Adjustment for Normal Eating (DAFNE),<sup>23</sup> aim to provide a foundation of  
16 knowledge and skills in flexible and safe insulin management, and in the UK, these are offered  
17 to all adults with T1D. While these programmes do not explicitly focus on IAH or SH, they  
18 provide more general training in diabetes self-management and include information for the  
19 general treatment and prevention of hypoglycaemia.<sup>20</sup> However, improvement in glycaemic  
20 outcomes following completion of such programmes is unclear. For instance, individuals that  
21 have completed DAFNE<sup>23</sup> do not always experience improved or sustained glycaemic  
22 outcomes, indicating that a more targeted approach may be required for individuals who  
23 continue to experience problematic hypoglycaemia despite education on the general  
24 principles.<sup>24</sup>  
25  
26  
27  
28  
29  
30  
31  
32  
33  
34  
35  
36  
37  
38  
39  
40  
41

42 Structured education with specific focus on hypoglycaemia management and avoidance has  
43 therefore been developed, such as, for instance, Blood Glucose Awareness Training (BGAT)<sup>25-</sup>  
44 <sup>30</sup> and self-management-oriented education programme (PRIMAS),<sup>31</sup> which seem to have  
45 similar benefit on hypoglycaemia risk as the more generic programmes, where these have been  
46 specifically compared.<sup>20</sup> Another programme is DAFNE - Hypoglycaemia Awareness  
47 Restoration Training (DAFNE-HART),<sup>32</sup> which was specifically designed to address the on-  
48 going needs of people with T1D who continued to experience severe hypoglycaemia and IAH  
49 after completing DAFNE.<sup>23</sup>  
50  
51  
52  
53  
54  
55  
56  
57  
58  
59  
60

1  
2  
3 DAFNE-HART was based on the research identifying abnormal activation of cortical brain  
4 regions in response to hypoglycaemia in people with IAH and the research identifying low  
5 concern, and unhelpful cognitions about hypoglycaemia among people with IAH.<sup>33</sup> It sought  
6 to address cognitive and motivational barriers associated with IAH and SH, especially in adults  
7 with T1D who continue to experience severe hypoglycaemia despite optimal previous insulin  
8 regimens and educational programmes.<sup>33</sup> However, to further enhance diabetes education, it  
9 has been argued that future programmes should incorporate behaviour change and other  
10 psychologically informed techniques to address cognitive and motivational barriers associated  
11 with IAH and SH.<sup>17,19,20,23</sup>

12  
13 To address this goal, a novel education programme has been further developed from DAFNE-  
14 HART, namely, Hypoglycaemia Awareness Restoration Programme despite optimised care  
15 (HARPdoc), which is currently being tested against the BGAT programme within a parallel,  
16 two-arm, group randomised, blinded clinical trial (with its own detailed protocol;  
17 NCT02940873; aka HARPdoc trial).<sup>33-34</sup> Both HARPdoc and BGAT are group therapies aimed  
18 at reducing hypoglycaemia, SH and IAH in adults with T1D who are continuing to experience  
19 SH and are being tested in the trial only in people whose problems with hypoglycaemia have  
20 persisted despite otherwise optimised management of their insulin treatment regimens and  
21 educational programmes. For more detail on the two education programmes tested with the  
22 trial and evaluated as part of the implementation, please see the Methods section.

### 23 24 25 **Aim and objectives**

26  
27 The aim of the study is to assess the way in which HARPdoc and BGAT are delivered in the  
28 context of the clinical trial sites, facilitating understanding of the potential link between the  
29 delivery of the programmes under investigation and the expected improvements in SH rates.  
30 This will be achieved in a qualitative, but also quantitative manner which will allow us to

1  
2  
3 explore the relationship between the implementation of the programmes and the clinical trial's  
4  
5 outcomes. Ultimately, this will enable the development of an implementation blueprint to  
6  
7 facilitate future implementation after the trial is completed.  
8  
9

10  
11 The study will address the following research questions for both education programmes from  
12  
13 the perspectives of the intervention stakeholders (including adults with T1D with problematic  
14  
15 hypoglycaemia, their relatives, as well as diabetes physicians, educators, psychologists, and  
16  
17 support staff):  
18  
19

- 20 1. To what extent are the programmes **acceptable, appropriate and feasible**?
- 21 2. To what extent were the programmes **delivered as intended** (*fidelity of delivery*)?
- 22 23 3. To what extent were the programmes **received as intended** (*fidelity of receipt*)?
- 24 25 4. How willing are key stakeholders to **adopt** the programmes, and what are the anticipated  
26 27 facilitators and barriers to adoption?
- 28 29 5. What are the anticipated facilitators **and barriers to sustainment** of the programmes  
30 31 long-term (i.e. after the trial is completed)?
- 32 33 6. What are the **costs** associated with implementing the programmes?
- 34 35 7. What are **unintended consequences** (positive/negative) associated with programmes?
- 36 37 8. What are the **contextual enablers and barriers** associated with the **implementation** of  
38 39 the programmes?
- 40 41 9. What **implementation strategies** were used within individual sites to improve  
42 43 implementation of the programmes?
- 44 45 10. Is there a **relationship between implementation and effectiveness outcomes**?
- 46 47  
48  
49  
50  
51  
52  
53  
54  
55  
56  
57  
58  
59  
60

## Methods

### Design

The design of our study is an effectiveness-implementation hybrid type 2,<sup>35</sup> placing equal focus on investigating the effectiveness of the two education programmes as part of the HARPdoc trial,<sup>33-34</sup> while simultaneously investigating the implementation of the programmes as part of the current protocol. We plan to apply a mixed-methods approach incorporating a variety of qualitative and quantitative data collection techniques, including surveys, structured interviews and psychometrically established measurement scales.

The study design was (1) *shaped* by implementation science concepts and frameworks, (2) *refined and informed* by the intervention stakeholders, and (3) *guided* by a tool specifically developed to guide the design of implementation research. In what follows, we describe the design process in more detail.

Firstly, the design was *shaped* by a number of complementary implementation science frameworks that have been selected in light of the aims and objective of the study:

- Medical Research Council (MRC) framework for evaluating complex interventions<sup>36-39</sup> to guide and inform the study design and processes (questions 1 to 10),
- Reach Effectiveness Adoption Implementation Maintenance (RE-AIM) framework<sup>40</sup> to guide selection of implementation outcomes in conjunction with Proctor et al<sup>41</sup> definitions of these outcomes (questions 1 to 7),
- Consolidated Framework for Implementation Research (CFIR)<sup>42-43</sup> to develop semi-structured interview topic guides (see Methods) and subsequently guide the coding and analysis of barriers and facilitators to programme implementation (question 8), and
- Implementation strategies compendium reported by Powel et al<sup>44</sup> (question 9)

1  
2  
3 Second, the design was *refined* by the key intervention stakeholders, including (a) individuals  
4 with lived experience of T1D, hypoglycaemia unawareness and an earlier version of the  
5 HARPdoc, namely, DAFNE-HART (this is the patient and public involvement group for the  
6 study or PWD group), and (b) health care professionals (HCPs) involved in the delivery of the  
7 interventions under investigation. The stakeholders critically reviewed for relevance, feasibility  
8 and clarity a selection of (a) factors commonly assessed and reported in implementation science  
9 research,<sup>40-44</sup> and (b) qualitative and quantitative assessment tools and methods (e.g. surveys  
10 and interview topic guides described in more detail in the *data collection plan* below), and their  
11 measurement time points. Figure 1 shows stakeholder groups involved in the research design  
12 process.  
13  
14  
15  
16  
17  
18  
19  
20  
21  
22  
23  
24  
25

26  
27 -----  
28 **Figure 1: Stakeholder groups involved in the design of the study**  
29 -----  
30

31  
32 Specifically, the outcome measures and materials were presented and reviewed, within an  
33 iterative process of continuous development and refinement, by the key stakeholders ( $N=28$ ),  
34 including the people with lived experience of T1D, IAH and education courses ( $n=6$ ), as well  
35 as the HCPs ( $n=22$ ) across participating diabetes centres (UK=4; US=1) in a series of focus  
36 groups ( $N=11$ ) between October and December 2017. Two 1.5h long sessions were conducted  
37 with same group of representatives of people with T1D, and nine 1h long sessions with different  
38 HCPs. Following each meeting, stakeholders' feedback was incorporated, and the final versions  
39 of the study materials further co-designed and refined. The final selection of the stakeholder-  
40 driven outcome measures, materials and methods (e.g. surveys and interview topic guides)  
41 proposed in this protocol was thus a result of an iterative development process where feedback  
42 from stakeholders fed directly into the development and refinement of the study design (see  
43 Table 1 presented in the *data collection plan* below).  
44  
45  
46  
47  
48  
49  
50  
51  
52  
53  
54  
55  
56  
57  
58  
59  
60



1  
2  
3 Lastly, the Implementation Science Research Development (ImpRes) tool and guide<sup>45-46</sup> was  
4 used to *guide* the study design and the stakeholder-driven planning process. ImpRes is a newly  
5 developed instrument that helps researchers to design high-quality implementation research,  
6 based on best evidence and expert recommendations. ImpRes is theory-agnostic in that it does  
7 not advocate or require use of a specific implementation framework; rather, ImpRes guides  
8 research teams through the various elements that a well-designed implementations study should  
9 consider, based on current literature and expert inputs. These include: choice of appropriate  
10 frameworks, articulation of patient, service and implementation outcomes and how they are to  
11 be assessed, articulation of the stakeholders of a study, a proforma for the definition of  
12 implementation costs and other elements. Using ImpRes, we were able to:

- 13 • *establish* a set of most relevant and feasible implementation outcome measures (drawing  
14 on Implementation Outcomes taxonomy,<sup>41</sup> implementation strategies,<sup>44</sup> and RE-AIM  
15 framework,<sup>40</sup>
- 16 • *identify the* most relevant and feasible validated surveys for the study,
- 17 • *formulate* instructions to participants for the selected validated pragmatic surveys,
- 18 • *develop* a set of interview topic guides drawing on implementation science frameworks,  
19 including the Implementation Outcomes taxonomy,<sup>41</sup> implementation strategies  
20 taxonomy,<sup>44</sup> RE-AIM framework,<sup>40</sup> and CFIR,<sup>42-43</sup>
- 21 • *identify* appropriate and most relevant participant groups for the study, and
- 22 • *develop* stakeholder-centred participant information sheets and consent forms.

23  
24  
25  
26  
27  
28  
29  
30  
31  
32  
33  
34  
35  
36  
37  
38  
39  
40  
41  
42  
43  
44  
45  
46  
47  
48  
49  
50  
51 Using the ImpRes tool and guide<sup>45-46</sup> ensured that the study design was (1) informed by  
52 implementation science frameworks, concepts and measures, and (2) informed by key  
53 stakeholders (Figure 1). This process was conducted within the context of a highly intricate  
54 study design of a parallel, two-arm, group randomised, blinded clinical trial where pragmatic  
55  
56  
57  
58  
59  
60

1  
2  
3 considerations for the current study had to be made (e.g., timelines for evaluating  
4 implementation outcomes).  
5  
6  
7

## 8 9 **Setting**

10  
11 This is an international, multisite study based in the UK and US. In the UK, participants will  
12 be recruited from 4 diabetes centres, across 4 National Health Service (NHS) Trusts in England  
13 – two in the greater London area, one in Dorset and one in South Yorkshire, while in the US  
14 from a single diabetes centre in Massachusetts between July 2018 and December 2019. The  
15 participating sites are specialist care diabetes centres that (i) provide structured education for  
16 type 1 diabetes and therefore have on-site diabetes educators, (ii) contain the necessary clinical  
17 capability and expertise in the hypoglycaemia management, and (iii) routinely receive tertiary  
18 referrals for problematic hypoglycaemia and therefore act as a channel for recruiting this very  
19 niche group of adults with type 1 diabetes and problematic hypoglycaemia.  
20  
21  
22  
23  
24  
25  
26  
27  
28  
29  
30  
31  
32

## 33 **Participants**

34  
35 Stakeholders of the HARPdoc trial<sup>33-34</sup> and the two educational programmes under  
36 investigation (described in detail below) form the participant group of the current study. They  
37 include course participants who are people with T1D with problematic hypoglycaemia,  
38 relatives of people enrolled in the trial (HARPdoc arm only since it encompasses relative  
39 session in Week 6), as well as the diabetes health care professionals (HCPs). People with T1D  
40 include participants who were found eligible for the trial and have either (a) fully, or (b)  
41 partially attended either one of the two programmes, or (c) have declined and not attended  
42 either one of the programmes. The HCPs comprise diabetes educators, physicians,  
43 psychologists, and support staff. For the quantitative part of data collection, a census approach  
44 will be used, and the entire available population will be approached i.e. all patients (N=96)  
45 participating in the trialled interventions and all HCPs (N=28) involved in the delivery of these  
46  
47  
48  
49  
50  
51  
52  
53  
54  
55  
56  
57  
58  
59  
60

1  
2  
3 interventions. For the qualitative part, availability sampling will be used within the subgroups  
4  
5 of the recruited population according to the site and course i.e. those HCPs and patients within  
6  
7 the participating hospitals recruited into or delivering one of the two programmes who are  
8  
9 available and willing to partake in the interview. The latter will culminate in sample of approx.  
10  
11 32 patients in total (4 sites x 2 patients x 2 types of courses x 2 sets of courses per site), and 28  
12  
13 HCPs. A convenience sampling will be used to recruit people who declined to take part in the  
14  
15 programme.  
16  
17  
18  
19

### 20 **Patient and public involvement**

21  
22 Patient and public involvement group i.e. people with diabetes (PWD) group for the study (as  
23  
24 described under the *Design* and in Figure 1) was involved in the development of the study  
25  
26 presented in this protocol from the very conception through to the selection of outcomes, design  
27  
28 of measures including topic guides, and formulating documents for ethical approval (incl.  
29  
30 information sheets and consent forms), as well as this protocol itself. A detailed description of  
31  
32 how the PWD group for the study has shaped the design of this study is outlined under the  
33  
34 Design section, and in Figure 1. The group will also be actively involved in the analysis, write  
35  
36 up and subsequent dissemination of the study findings, going forward.  
37  
38  
39  
40  
41

### 42 **Trialled educational programmes**

43  
44 The clinical trial testing the effectiveness of the programmes is currently ongoing and blinded  
45  
46 (NCT02940873)<sup>33-34</sup> and therefore, in what follows, we provide only a high-level overview of  
47  
48 the programmes (see also Table 1) with detailed information on the curricula purposefully  
49  
50 omitted to prevent contamination.  
51  
52  
53

54  
55 The trial is testing two group programmes – HARPdoc<sup>34</sup> and BGAT.<sup>25-30</sup> The former  
56  
57 incorporates structured education relevant to hypoglycaemia management, avoidance and  
58  
59 strategies to restore hypoglycaemia awareness with behaviour change and psychologically  
60

1  
2  
3 informed techniques aimed to address the cognitive barriers to hypoglycaemia avoidance  
4 associated with IAH. It also involves family members in the final session. The curriculum is  
5  
6 delivered over 6 weeks in a combination of group and individual sessions facilitated by two  
7  
8 experienced diabetes educators, trained to deliver the intervention and supported in its delivery  
9  
10 by the study clinical psychologist. The programme was piloted in the DAFNE-HARP study,  
11  
12 and amended in the light of the experience of that study.<sup>32</sup> A significant and substantial  
13  
14 reduction of SH from 10 to 0.5 episodes per year was document in the pilot study, as well as a  
15  
16 significant reduction in worry and improved behavioural avoidance of hyperglycaemia.<sup>32</sup>  
17  
18  
19  
20  
21

22  
23 The latter is a UK's National Institute for Health and Care Excellence (NICE)<sup>25</sup> recommended  
24  
25 programme focused on recognising and reducing both, hypo and hyperglycaemia and  
26  
27 empowering people with T1D to anticipate, detect, treat and prevent extremes in blood glucose  
28  
29 levels.<sup>25-30</sup> The curriculum is delivered by one experienced diabetes educator, trained in its  
30  
31 delivery by one of the clinical psychologists who originally designed it. For the purposes of the  
32  
33 trial, the BGAT timetable has been modified to be delivered in the same time frame as the  
34  
35 HARPdoc, with the original eight 2 hour sessions delivered over 6 weeks, and as two sessions  
36  
37 in one day in weeks 1,2,3 and 6. While BGAT has proved successful in improving glycaemic  
38  
39 control, hypoglycaemia awareness,<sup>27</sup> fear of hypoglycaemia,<sup>29</sup> as well as in reducing SH  
40  
41 episodes<sup>27-28</sup> from 1.78 to 0.13 as assessed at one-year post-intervention,<sup>28</sup> it has not yet been  
42  
43 tested specifically in people whose SH persists despite exposure to structured education.<sup>27,29</sup>  
44  
45  
46  
47  
48  
49

50  
51  
52  
53  
54  
55  
56  
57  
58  
59  
60  
-----  
**Table 1:** The structure and delivery of courses  
-----

### **Data collection plan**

All data collected will be conducted with the view of developing an implementation blueprint after the trial is completed. As previously described, all implementation outcomes, measures

1  
2  
3 and methods presented in this protocol have been reviewed for relevance and feasibility and  
4  
5 co-designed with key stakeholders. In what follows, we describe our data collection plan in  
6  
7 relation to the questions we are seeking to address, while in Table 2 below, we provide the final  
8  
9 set of stakeholder-driven implementation outcomes, study design and methods.  
10  
11  
12  
13

14 -----  
15 **Table 2:** Stakeholder-driven data collection plan  
16 -----  
17

18  
19 **Question 1:** To what extent are the programmes **acceptable, appropriate** and **feasible** to key  
20  
21 intervention stakeholders?  
22

23 Previously validated pragmatic surveys<sup>47</sup> will be used to assess the acceptability,  
24  
25 appropriateness and feasibility of HARPdoc and BGAT. The surveys will be completed by key  
26  
27 stakeholders, i.e. people with T1D, relatives of people enrolled on HARPdoc and diabetes  
28  
29 HCPs who will assess the degree to which they perceive the programmes acceptable, feasible  
30  
31 and appropriate for diabetes and hypoglycaemia management. In addition, one-to-one semi-  
32  
33 structured interviews with stakeholders will also be conducted. The interviews will  
34  
35 complement the survey data and explore in more detail stakeholders' perceptions and  
36  
37 experiences of HARPdoc and BGAT in terms of acceptability, appropriateness and feasibility.  
38  
39 Both surveys and interviews will occur at one-time point, after the programme completion.  
40  
41  
42  
43  
44

45 **Question 2:** To what extent were programmes **delivered as intended** by diabetes educators  
46  
47 (*fidelity of delivery*)?  
48

49 Relevant sections of audiotapes from both the BGAT and HARPdoc group sessions across each  
50  
51 of the sites will be assessed; this will form the fidelity of delivery part of the study that will be  
52  
53 led by the clinical study team. An observational assessment tool has been adapted and refined  
54  
55 by the clinical study team from the AMIGOS.<sup>48</sup> Two trained and experienced independent raters  
56  
57  
58  
59  
60

1  
2  
3 will use the tool to assess the delivery of the programmes by the diabetes educators from the  
4  
5 audio recordings of individual sessions across each site.  
6  
7

8  
9 **Question 3: To what extent were programmes **received as intended** by adults with T1D**  
10  
11 **(fidelity of receipt)?**

12  
13 Literature acknowledges patients as active participants in health interventions with the fidelity  
14  
15 of receipt focused on the way the intervention is received by the individuals as highly important  
16  
17 although seldom addressed in health research.<sup>49</sup> We will therefore explore the fidelity of receipt,  
18  
19 i.e. fidelity with which the content of HARPdoc and BGAT is received by the adults with T1D,  
20  
21 as part of the one-to-one semi-structured interview (which will also explore acceptability,  
22  
23 appropriateness and feasibility of the programmes as described above). The participants who  
24  
25 have had a useful exposure to the programmes and have either fully or partly (at least the first  
26  
27 3 days attended) completed one of the programmes will be recruited. We will explore their  
28  
29 views and experience of the programme in relation to the extent they feel able to:  
30  
31  
32

- 33 • *engage* with the programme content and their group,
- 34 • *understand* the content delivered to them by the diabetes educators, and
- 35 • *acquire and apply* the programme skills to their everyday management of hypoglycaemia.

36  
37 This will help advance our knowledge of the programmes in terms of how easy or difficult it is  
38  
39 for individuals to engage with the content, as well as to understand and apply the skills acquired  
40  
41 as part of HARPdoc and BGAT to manage hypoglycaemia.  
42  
43  
44  
45  
46  
47  
48

49 **Question 4: How willing are key stakeholders to **adopt** the programmes?**

50  
51 As part of the interviews with the key stakeholders (described above in detail), we will explore  
52  
53 the intention to adopt HARPdoc and BGAT from two very specific standpoints. Firstly, from  
54  
55 the perspective of the provider or diabetes HCPs (which is commonly explored in health  
56  
57 research),<sup>41</sup> where the interview will explore the extent to which the provider intends to adopt  
58  
59  
60

1  
2  
3 the programme (e.g. deliver the programme again or refer people onto such programme) after  
4  
5 the trial is completed.  
6  
7

8  
9 Secondly, we will explore the intention to adopt from the perspective of adults with T1D who  
10  
11 are at the receiving end and active participants in the intervention (far less commonly explored  
12  
13 in research).<sup>41</sup> We plan to explore the extent to which adults with T1D intend to (a) use the  
14  
15 intervention skills in their everyday diabetes management, and (b) use such a programme again  
16  
17 or recommend it to other individuals with T1D and problematic hypoglycaemia.  
18  
19

20  
21 In addition, we plan to interview participants who, although eligible, chose not to take part in  
22  
23 HARPdoc and BGAT. This will allow us to explore reasons that may potentially prevent adults  
24  
25 with T1D and problematic hypoglycaemia in participating in such programmes in future. This  
26  
27 is important in terms of exploring the reach<sup>30</sup> of both interventions (i.e. the absolute number,  
28  
29 proportion, and representativeness of individuals who are willing to participate in a given  
30  
31 initiative).<sup>30</sup>  
32  
33

34  
35  
36 **Question 5: What are the potential facilitators and barriers to sustainment of the**  
37  
38 **programmes long-term after the trial is complete and an effective programme identified?**  
39

40  
41 As part of the one-to-one interview with the key stakeholders (described above in detail), we  
42  
43 will explore potential facilitators and barriers to sustained use of HARPdoc and BGAT after  
44  
45 the trial is completed from the perspectives of providers (i.e. diabetes HCPs) as well as the  
46  
47 course participants who are adults with T1D and the relatives of people in the HARPdoc arm  
48  
49 of the trial who attended the last week of the programme.  
50  
51

52  
53 With the providers, the focus will be on understanding the potential facilitators and barriers to  
54  
55 the implementation of HARPdoc and BGAT into the local services after the trial is completed.  
56  
57 In contrast, with the adults with T1D who have either fully or partially completed one of the  
58  
59 programmes as well as the relatives, the focus will be on exploring the potential and experienced  
60

1  
2  
3 facilitators and barriers to sustained use of knowledge and skills gained in long-term  
4  
5 hypoglycaemia management.  
6  
7

8  
9 **Question 6:** What are the **costs** associated with implementing the programmes to the key  
10  
11 **stakeholders?**  
12

13 One-to-one interviews with the key stakeholders will also explore costs, in terms of time and  
14  
15 money, associated with implementing HARPdoc and BGAT. With the HCPs, the focus will be  
16  
17 on costs incurred as a result of the delivery, preparation and training in relation to the  
18  
19 programme, while with adults with T1D and the relatives, the focus will be on the costs incurred  
20  
21 attending and completing the programme.  
22  
23  
24

25  
26 **Question 7:** Are there any **unintended consequences** associated with either one of the  
27  
28 **programmes?**  
29

30 One-to-one interviews with the key stakeholders will also explore any unintended  
31  
32 consequences, both positive and negative, associated with HARPdoc and BGAT. Unintended  
33  
34 consequences will be explored from the perspectives of the HCPs, adults with T1D and their  
35  
36 relatives, in relation to how the programme has impacted on them and the people around them.  
37  
38  
39

40  
41 **Question 8:** What are the **contextual enablers and barriers** associated with the  
42  
43 **implementation** of the programmes?  
44

45 The contextual enablers and barriers to intervention implementation that stakeholders have  
46  
47 experienced will be explored and assessed in two ways: interviews with the key stakeholders  
48  
49 and meeting minutes between HCPs involved in the trial.  
50

51  
52  
53 *One-to-one interviews* with the key stakeholders (described above) will explore context of  
54  
55 HARPdoc and BGAT in more detail from the perspectives of the HCPs, adults with T1D and  
56  
57 the relatives. They will focus on exploring the factors that facilitated delivery or present a  
58  
59 particular challenge to delivery.  
60



1  
2  
3 *Minutes from meetings* taking place with the HCPs as part of the trial management processes  
4  
5 will be assessed for contextual factors affecting delivery of interventions using qualitative  
6  
7 content analysis. This will help us identify any potential barriers or facilitators to post-trial  
8  
9 adoption, implementation and sustained use of the successful programme.  
10  
11  
12

13 **Question 9: What implementation strategies were used within individual sites to improve**  
14 **the implementation of the programmes?**  
15  
16

17  
18 As part of the one-to-one interviews with the diabetes HCPs (described above), we will explore  
19  
20 and identify implementation strategies (i.e. methods or techniques used to enhance and promote  
21  
22 adoption, implementation and sustainability of an intervention)<sup>44</sup> used within individual sites  
23  
24 during the trial in order to improve delivery and implementation of the programmes. In  
25  
26 addition, we will also explore any potential strategies that may be important to consider by the  
27  
28 local sites wishing to implement HARPdoc and BGAT in future after the trial is completed.  
29  
30  
31

32  
33 **Question 10: What is the relationship between the implementation and effectiveness**  
34 **outcomes of the trial?**  
35  
36

37  
38 Clinical outcome data contain information on the primary outcome i.e., the number of SH  
39  
40 events over the preceding year, as well as at 12 and 24 months' post-course (as recorded in the  
41  
42 anonymised SH recall form), and the secondary outcomes (e.g. hypoglycaemia awareness  
43  
44 score) in people with T1D taking part in the programmes. These data will be examined in  
45  
46 relation to the pragmatic implementation outcome (acceptability, feasibility and  
47  
48 appropriateness) survey data. This assessment will enable us to explore the relationship between  
49  
50 the implementation and the effectiveness of the two arms of the trial.  
51  
52  
53

## 54 **Data Analysis**

55  
56  
57 Data will be analysed using quantitative and qualitative approaches.  
58  
59  
60

### Quantitative analysis

Descriptive statistics of survey and clinical trial data will be provided. Parametric and nonparametric tests will be employed to compare the survey responses between the two arms of the trial while controlling for a variety of demographic and socioeconomic variables, including the diabetes centres. Random intercept linear, logistic and Poisson regression models (depending on the distribution of the outcome) will be used to explore the relationship between implementation data and clinical trial outcome data. Mediation analysis with the use of Structural Equation Models will also be employed to understand the potential pathways in which implementation has an impact on the effectiveness of the two suggested education programmes. An implementation by treatment interaction will be included to allow the effect of implantation to differ at each arm of the trial and across different diabetes centres. All analyses will be conducted in STATA 14.1.

### Qualitative analysis

Interviews with course participants and HCPs as well as trial's meeting minutes will be analysed qualitatively, using inductive and deductive content analysis approach until saturation is reached.<sup>50</sup> Analysis will be conducted according to the intervention (BGAT and HARPdoc), and the diabetes centre, especially UK versus US due to differences in the healthcare systems. We will use the CFIR<sup>41-42</sup> to guide the coding and analysis (i.e. framework analysis) of interview data to identify barriers and facilitators to the implementation and sustainment of HARPdoc and BGAT. This approach has been used previously i.e. CFIR has been applied post-implementation to investigate facilitators and barriers to implementation among stakeholders who had already adopted and implemented an innovation, thus identifying determinants of implementation post hoc.<sup>41-42</sup> Whilst we are aware that this approach is not entirely consistent with Damschroder's guidance stipulating that CFIR should be applied pre-implementation to investigate facilitators/barriers to implementation,<sup>41-42</sup> given the constraints of conducting the

effectiveness-implementation hybrid type 2 where equal focus is placed on both, implementation and effectiveness, it is not possible to follow this guidance. However, we strongly believe that our approach is of value in identifying *actual*, rather than *anticipated*, facilitators and barriers to the implementation and sustainment of HARPdoc and BGAT.

In line with Damschroder et al's guidance,<sup>42-43</sup> we plan to link determinants of implementation to implementation outcomes as part of the quantitative analyses described above where we propose to link the pragmatic implementation outcome survey data with the trial outcome data with the logistic and Poisson regression models.

## Discussion

This is a stakeholder-driven, mixed-methods, multi-site, international project aimed at assessing the way in which two education programmes, HARPdoc and BGAT, implemented within an effectiveness-implementation hybrid type 2 trial are delivered in participating diabetes centres based in the UK and US. Such evaluation will facilitate understanding of the association between programme implementation and the trial's end points. In the process, we will address a specific set of implementation objectives:

- *understand* the extent to which the programmes are perceived to be acceptable, appropriate and feasible to key stakeholders,
- *understand* the extent to which the programmes *are delivered and received as intended*,
- *identify* contextual enablers and facilitators to the implementation of the programmes,
- *identify* potential barriers and facilitators to sustainment and intention to adopt the programmes long-term after the trial is completed,
- *identify* any unintended consequences and *understand* implementation costs associated with the programmes,
- *identify* strategies used to implement the programmes within the trial, and

- *Identify* potential links between implementation and clinical effectiveness of the programmes.

Such evaluation will also enable us to develop an evidence-based implementation blueprint to help guide the implementation, sustainment and scale up of HARPdoc and/or BGAT after the trial is completed.

The study in this protocol depicts a complex research landscape. It is concerned with evaluating implementation of two educational programmes (i.e., HARPdoc and BGAT) introduced and currently being tested within a parallel, two-arm, group randomised, blinded clinical trial, from the perspectives of multiple key intervention stakeholders (including, the adults with T1D, their relatives, as well as diabetes physicians, educators, psychologists and support staff). Within such a complex landscape, continuous stakeholder engagement is essential to the design of a meaningful implementation project. It is also critical in adequately addressing potential challenges and operational issues early on, thus helping maximise feasibility and relevance, in particular, in relation to the methodological approach and measures, as well as the subsequent data collection.

One such challenge was encountered in relation to the potential pre-intervention assessments. The complexity of assessing programme delivery within a parallel, two-arm, group randomised, blinded trial design means that the opportunity to assess course participants just before the start of the programme when they are fully aware of the arm that they are assigned to is small and dependant on the receipt of the ethical approval (for the implementation). This is further compounded by the methodological issues around surveying or interviewing programme participants about their views of the programmes while they are being randomly assigned to one or the other; something that could potentially contaminate the trial. Hence, the

1  
2  
3 pre-intervention assessments in the current study were not feasible and the primary focus has  
4  
5 been placed on post-intervention measurements.  
6  
7

8  
9 Nonetheless, the current study offers a stakeholder-driven mixed methods approach to  
10  
11 evaluating the implementation of two novel psychoeducational programmes in adults with T1D  
12  
13 and problematic hypoglycaemia within the UK and US healthcare systems. While the  
14  
15 difference in the two healthcare systems is fundamental, i.e. public versus private provision of  
16  
17 care, it provides an important insight into the breadth of potential barriers and facilitators to the  
18  
19 implementation of such complex programmes, including any delivery adaptations potentially  
20  
21 needed to achieve population coverage and scale up; ultimately, enabling more people with  
22  
23 T1D and problematic hypoglycaemia to benefit from the trialled programmes worldwide. Due  
24  
25 to the complexity of the trialled interventions and the niche patient group that they are designed  
26  
27 for, the inclusion of the specialist UK and US sites was pragmatically critical since they are  
28  
29 leading tertiary referral centres with world renowned expertise in hypoglycaemia management,  
30  
31 recognition and treatment.  
32  
33  
34  
35

36  
37 The findings will thus inform the development of an implementation blueprint and the  
38  
39 identification of specific implementation strategies for the post-trial scale-up of the  
40  
41 programme/s into routine services. The findings will also form the basis for a further  
42  
43 international trial (likely a hybrid type 3 effectiveness-implementation trial)<sup>35</sup> focused on  
44  
45 evaluating implementation success of a number of different implementation strategies in  
46  
47 scaling up and sustaining the clinically effective intervention in different healthcare systems,  
48  
49 following the current trial. Such developments will in turn contribute to the scientific  
50  
51 understanding of methods for evaluating and implementing complex interventions within a  
52  
53 complex organisational structure of a health care system, and within two different modes of  
54  
55  
56  
57  
58  
59  
60

1  
2  
3 care provision, i.e. private/US versus public/UK, thus addressing the gaps on many important  
4  
5 methodological and practical issues.  
6  
7

### 8 9 **Ethics and dissemination**

10  
11 The study described in this protocol has been reviewed and given favourable opinion by the  
12  
13 Harrow Research Ethics Committee (18/LO/1020; 240752) on October 01, 2018. Informed  
14  
15 consent will be sought from all research participants for this study. The study will be conducted  
16  
17 in accordance with the Good Clinical Practice and recommendations for physicians involved  
18  
19 in research on human subjects adopted by the 18<sup>th</sup> World Medical Assembly, Helsinki 1964  
20  
21 and later revisions. The study will produce key information to the stakeholders on planning,  
22  
23 funding and implementation of the interventions under investigation. Hence, the findings will  
24  
25 be disseminated through peer-reviewed journals, relevant national and international meetings,  
26  
27 as well as educational events within the individual hospitals to ensure that they are brought to  
28  
29 the appropriate stakeholders. We will report to people with diabetes and their carers through  
30  
31 publications of the Juvenile Diabetes Research Foundation, study website, and by the  
32  
33 presentation to patient groups.  
34  
35  
36  
37  
38  
39

### 40 41 **Data sharing statement**

42  
43 After the completion of the study, the anonymised dataset that supports published results will  
44  
45 be deposited in a secure data repository (e.g. Zenodo) so that it is accessible for future reuse.  
46  
47

### 48 49 **Funding**

50  
51 The funding for this study was supported by the *JDRF* (4-SRA-2017-266-M-N). LH, IB, SA  
52  
53 and NS are funded by the *National Institute for Health Research* (NIHR) via the '*Collaboration  
54  
55 for Leadership in Applied Health Research and Care South London*' (CLAHRC South London)  
56  
57 at King's College Hospital National Health Service (NHS) Foundation Trust, London, UK. LH  
58  
59  
60

1  
2  
3 and NS are also funded by King's Improvement Science, which is part of the NIHR CLAHRC  
4  
5 South London and comprises a specialist team of improvement scientists and senior researchers  
6  
7 based at King's College London. King's Improvement Science is funded by King's Health  
8  
9 Partners (Guy's and St Thomas' NHS Foundation Trust, King's College Hospital NHS  
10  
11 Foundation Trust, King's College London and South London and Maudsley NHS Foundation  
12  
13 Trust), Guy's and St Thomas' Charity, the Maudsley Charity and the Health Foundation. NS  
14  
15 is also funded by the South London and Maudsley NHS Foundation Trust. IB is supported by  
16  
17 the *NIHR Biomedical Research Centre* at South London and Maudsley NHS Foundation Trust  
18  
19 and by the NIHR Collaboration for Leadership in Applied Health Research and Care South  
20  
21 London at King's College Hospital NHS Foundation Trust, King's College London.  
22  
23  
24  
25

26  
27 The funding agreements ensured the authors' independence in designing the study, interpreting  
28  
29 the data, writing, and publishing the report. The views expressed are those of the authors and  
30  
31 not necessarily those of the NHS, the NIHR or the Department of Health and Social Care.  
32  
33  
34

### 35 **Competing interests**

36  
37  
38 NS is the Director of London Safety & Training Solution Ltd, which provides advisory and  
39  
40 training services on safety and quality improvement to hospitals and training programs  
41  
42 internationally. TS serves as a consultant to F. Hoffmann-La Roche Ltd Diagnostics providing  
43  
44 advisory research services in relation to innovations for multidisciplinary tumor boards. The  
45  
46 remaining authors declare that they have no competing interests.  
47  
48  
49

### 50 **Authors' contributions**

51  
52  
53 As per International Committee of Medical Journal Editors guidelines, the co-authors have  
54  
55 contributed as following:  
56  
57  
58  
59  
60

- made substantial contributions to conception and design, or acquisition of data, or analysis and interpretation of data; TS, LH, IB, AH, NS, SA, ES, Mike Kendall for PWD Group
- been involved in drafting the manuscript or revising it critically for important intellectual content; TS, LH, IB, AH, NS, SA, ES, Mike Kendall for PWD Group
- given final approval of the version to be published. Each author should have participated sufficiently in the work to take public responsibility for appropriate portions of the content; TS, LH, IB, AH, NS, SA, ES, Mike Kendall for PWD Group
- agreed to be accountable for all aspects of the work in ensuring that questions related to the accuracy or integrity of any part of the work are appropriately investigated and resolved; TS, LH, IB, AH, NS, SA, ES, Mike Kendall for PWD Group



## List of abbreviations

BERTIE = Beta Cell Education Resources for Training

BGAT = Blood Glucose Awareness Training

CFIR = Consolidated Framework for Implementation Research

DAFNE = Dose Adjustment for Normal Eating

DAFNE HART = Dose Adjustment for Normal Eating Hypoglycaemia Awareness Restoration Training

HARpdoc = Hypoglycaemia Awareness Restoration Programme despite optimised care

HCP – Health Care Professional

IAH = Impaired Awareness of Hypoglycaemia

MRC = Medical Research Council

NICE = National Institute for Health and Care Excellence

PWD = People With Diabetes

RE-AIM = Reach Effectiveness Adoption Implementation Maintenance

SH = Severe Hypoglycaemia

T1D = Type 1 Diabetes

## Acknowledgements

We would like to thank the representatives of the people with type 1 diabetes, as well as the health care professionals involved, for their time and commitment in the design of this study protocol. The collaborating authors for the PWD Group are Mr Arthur Durrant, Mr Mike Kendall, Ms Victoria Ruszala, Ms Mel Stephenson, and Ms Lis Warren (London, UK).

## References

1. Seaquist ER, Anderson J, Childs B, Cryer P, Dagogo-Jack S, Fish L, Heller SR, Rodriguez H, Rosenzweig J, Vigersky R. Hypoglycemia and diabetes: a report of a workgroup of the American Diabetes Association and the Endocrine Society. *Diabet Care*. 2013;36:1384-95.
2. Wild D, von Maltzahn R, Brohan E, Christensen T, Clauson P, Gonder-Frederick L. A critical review of the literature on fear of hypoglycemia in diabetes: Implications for diabetes management and patient education. *Patient Educ Couns*. 2007;68:10-5.
3. Pedersen-Bjergaard U, Pramming S, Heller SR, Wallace TM, Rasmussen AK, Jørgensen HV, Matthews DR, Hougaard P, Thorsteinsson B. Severe hypoglycaemia in 1076 adult patients with type 1 diabetes: influence of risk markers and selection. *Diabetes Metab Res Rev*. 2004;20:479-86.
4. UK Hypoglycaemia Study Group. Risk of hypoglycaemia in types 1 and 2 diabetes: effects of treatment modalities and their duration. *Diabetologia*. 2007;50:1140-1147.
5. Akram K, Pedersen-Bjergaard U, Carstensen B, Borch-Johnsen K, Thorsteinsson B. Frequency and risk factors of severe hypoglycaemia in insulin-treated Type 2 diabetes: a cross-sectional survey. *Diabet Med*. 2006;23:750-6.
6. Lawton J, Rankin D, Elliott J, Heller SR, Rogers HA, De Zoysa N, Amiel S: Experiences, views, and support needs of family members of people with hypoglycemia unawareness: interview study. *Diabet Care*. 2014;37:109-115.

- 1  
2  
3 7. Pedersen-Bjergaard U, Færch L, Allingbjerg ML, Agesen R, Thorsteinsson B. The influence  
4 of new European Union driver's license legislation on reporting of severe hypoglycemia by  
5 patients with type 1 diabetes. *Diabet Care*. 2015;38:29-33.  
6  
7
- 8  
9  
10 8. Diabetes Control and Complications Trial/Epidemiology of Diabetes Interventions and  
11 Complications Study Research Group, Jacobson AM, Musen G, Ryan CM, Silvers N, Cleary  
12 P, Waberski B, Burwood A, Weinger K, Bayless M, Dahms W, Harth J. Long-term effect of  
13 diabetes and its treatment on cognitive function. *N Engl J Med*. 2007;356:1842-52.  
14  
15
- 16  
17  
18 9. Patterson CC, Dahlquist G, Harjutsalo V, Joner G, Feltbower RG, Svensson J, Schober E,  
19 Gyürüs E, Castell C, Urbonaitė B, Rosenbauer J, Iotova V, Thorsson AV, Soltész G. Early  
20 mortality in EURODIAB population-based cohorts of type 1 diabetes diagnosed in childhood  
21 since 1989. *Diabetologia*. 2007;50:2439-42.  
22  
23
- 24  
25  
26 10. Feltbower RG, Bodansky HJ, Patterson CC, Parslow RC, Stephenson CR, Reynolds C,  
27 McKinney PA. Acute complications and drug misuse are important causes of death for  
28 children and young adults with type 1 diabetes: results from Yorkshire Register of diabetes in  
29 children and young adults. *Diabet Care*. 2008;31:922-6  
30  
31
- 32  
33  
34 11. Skrivarhaug T, Bangstad HJ, Stene LC, Sandvik L, Hanssen KF, Joner G. Long-term mortality  
35 in a nationwide cohort of childhood-onset type 1 diabetic patients in Norway. *Diabetologia*.  
36 2006;49:298-305.  
37  
38
- 39  
40  
41 12. Huxley RR, Peters SA, Mishra GD, Woodward M: Risk of all-cause mortality and vascular  
42 events in women versus men with type 1 diabetes: a systematic review and meta-analysis.  
43 *Lancet Diabetes Endocrinol*. 2015;3:198-206.  
44  
45
- 46  
47  
48 13. The Healthcare Quality Improvement Partnership NDA: National Diabetes Audit 2012–2013  
49 Report 2: Compl Mort. 2015  
50  
51
- 52  
53  
54 14. Centre THaSCI: The Health and Social Care Information Centre, Hospital Episode Statistics  
55 for England. Inpatient statistics, 2012-13. 2014.  
56  
57  
58  
59  
60

15. Geddes J, Schopman JE, Zammitt NN, Frier BM: Prevalence of impaired awareness of hypoglycaemia in adults with Type 1 diabetes. *Diabet Med.* 2008;25:501-504.
16. Hopkins D, Lawrence I, Mansell P, Thompson G, Amiel S, Campbell M, Heller S: Improved biomedical and psychological outcomes 1 year after structured education in flexible insulin therapy for people with type 1 diabetes: the U.K. DAFNE experience. *Diabet Care.* 2012;35:1638-1642.
17. Rogers HA, de Zoysa N, Amiel SA: Patient experience of hypoglycaemia unawareness in Type 1 diabetes: are patients appropriately concerned? *Diabet Med.* 2012;29:321-327.
18. Anderbro T, Gonder-Fredrick L, Bolinder J, Lins P-E, Wredling R, Moberg E, Lisspers J, Johansson U-B. Fear of hypoglycemia: relationship to hypoglycemic risk and psychological factors. *Acta Diabetol.* 2015;52(3):581–589.
19. Rankin D, Elliott J, Heller S, Amiel S, Rogers H, DeZoysa N, Lawton J. Experiences of hypoglycaemia unawareness amongst people with Type 1 diabetes: A qualitative investigation. *Chronic Illn.* 2014;10(3):180-91.
20. Yeoh E, Choudhary P, Nwokolo M, Ayis S, Amiel SA. Interventions that restore awareness of hypoglycemia in adults with type 1 diabetes: A systematic review and meta-analysis. *Diabet Care.* 2015;38(8):1592-1609.
21. Muhlhauser I, Jorgens V, Berger M. Bi-centric evaluation of a teaching and treatment programme for type 1 (insulin-dependent) diabetic patients: improvement of metabolic control and other measures of diabetes care for up to 22 months. *Diabetologia.* 1983;25:470–476.
22. BERTIE Type 1 Diabetes Education Programme. <https://www.bertieonline.org.uk/>. Accessed 12 September 2018.
23. Heller S, Lawton J, Amiel S, Cooke D, Mansell P, Brennan A, et al. Improving management of Type 1 diabetes in the UK: The Dose Adjustment for Normal Eating (DAFNE) programme as a research test-bed. A mixed method analysis of the barriers and facilitators to successful

- 1  
2  
3 diabetes self-management, a health economic analysis, a cluster RCT of different models of  
4 delivery of an educational intervention and the potential of insulin pumps and additional  
5 educator input to improve outcomes. Programme Grants Appl Res. 2014;2(5).  
6  
7  
8  
9
- 10 24. Elliott J, Jacques RM, Kruger J, Campbell MJ, Amiel SA, Mansell P, Speight J, Brennan A,  
11 Heller SR. Substantial reductions in the number of diabetic ketoacidosis and severe  
12 hypoglycaemia episodes requiring emergency treatment lead to reduced costs after structured  
13 education in adults with Type 1 diabetes. Diabet Med. 2014;31:847-53.  
14  
15  
16  
17  
18
- 19 25. National Institute for Health and Care Excellence. Type 1 diabetes in adults: diagnosis and  
20 management. Pg. 17 Recommendation 1.3.7.  
21  
22 [https://www.nice.org.uk/guidance/ng17/resources/type-1-diabetes-in-adults-diagnosis-and-](https://www.nice.org.uk/guidance/ng17/resources/type-1-diabetes-in-adults-diagnosis-and-management-1837276469701)  
23 [management-1837276469701](https://www.nice.org.uk/guidance/ng17/resources/type-1-diabetes-in-adults-diagnosis-and-management-1837276469701). Accessed 12 September 2018.  
24  
25  
26  
27
- 28 26. Broers S, van Vliet KP, le Cessie S, Spinhoven P, van der Ven NC, Radder JK. Blood glucose  
29 awareness training in Dutch type 1 diabetes patients: one-year follow-up. Neth J Med.  
30 2005;63(5):164-9.  
31  
32  
33  
34
- 35 27. Kinsley BT, Weinger K, Bajaj M, Levy CJ, Simonson DC, Quigley M, Cox DJ, Jacobson  
36 AM. Blood glucose awareness training and epinephrine responses to hypoglycaemia during  
37 intensive treatment in type 1 diabetes. Diabet Care. 1999;22(7):1022-1028.  
38  
39  
40  
41
- 42 28. Schachinger H, Hegar K, Hermanns N, Straumann M, Keller U, Fehm-Wolfsdorf G, Berger  
43 W, Cox D. Randomized controlled clinical trial of Blood Glucose Awareness Training (BGAT  
44 III) in Switzerland and Germany. J Behav Med. 2005;28(6):587-94.  
45  
46  
47  
48
- 49 29. Cox DJ, Gonder-Frederick L, Polonsky W, Schlundt D, Kovatchev B, Clarke W: Blood  
50 glucose awareness training (BGAT-2): Long-term benefits. Diabet Care. 2001;24:637-642.  
51  
52  
53
- 54 30. Cox D, Gonder- F redrick L, Polonsky W, Schlundt D, Julian D, Clarke W: A multicenter  
55 evaluation of blood glucose awareness training-II. Diabet Care. 1995;18:523-528.  
56  
57  
58  
59  
60

- 1  
2  
3  
4  
5  
6  
7  
8  
9  
10  
11  
12  
13  
14  
15  
16  
17  
18  
19  
20  
21  
22  
23  
24  
25  
26  
27  
28  
29  
30  
31  
32  
33  
34  
35  
36  
37  
38  
39  
40  
41  
42  
43  
44  
45  
46  
47  
48  
49  
50  
51  
52  
53  
54  
55  
56  
57  
58  
59  
60
31. Hermanns N, Kulzer B, Ehrmann D, BergisJurgan N, Haak T. The effect of a diabetes education programme (PRIMAS) for people with type 1 diabetes: results of a randomized trial. *Diabetes Res Clin Pract.* 2013;102:149–157
  32. de Zoysa N, Rogers H, Stadler M, Gianfrancesco C, Beveridge S, Britneff E, Choudhary P, Elliott J, Heller S, Amiel SA: A psychoeducational program to restore hypoglycemia awareness: the DAFNE-HART pilot study. *Diabet Care.* 2014;37:863-866.
  33. Beyond education: A Hypoglycaemia Awareness Restoration Programme for people with type 1 diabetes and problematic hypoglycaemia persisting despite optimised care. <https://www.harpdoc.org/>. Accessed 12 September 2018.
  34. Amiel S, Choudhary P, Jacob P, Smith E, de Zoysa N, Gonder-Frederick L, Kendall M. et al. A group randomised controlled trial of a novel intervention addressing cognitions in adults with treatment-resistant problematic hypoglycaemia complicating type 1 diabetes therapy – the Hypoglycaemia Awareness Restoration Programme for people with type 1 diabetes and problematic hypoglycaemia persisting despite optimised self-care (HARPdoc). *BMJ Open.* 2019;9(6):e030356.
  35. Curran GM, Bauer M, Mittman B, Pyne JM, Stetler C. Effectiveness-implementation hybrid designs: combining elements of clinical effectiveness and implementation research to enhance public health impact. *Med Care.* 2012;50(30):217-226.
  36. The Medical Research Council. Developing and evaluating complex interventions: new guidance. <https://www.mrc.ac.uk/documents/pdf/complex-interventions-guidance/>
  37. Craig P, Dieppe P, Macintyre S. Developing and evaluating complex interventions: new guidance: MRC. 2008;337:a1655.
  38. Craig P, Dieppe P, Macintyre S, Michie S, Nazareth I, Petticrew M. Developing and evaluating complex interventions: the new medical research council guidance. *Int J Nurs Stud.* 2013;50:587-592;p.591.

- 1  
2  
3 39. Moore GF, Audrey S, Barker M, Bond L, Bonnel C., Hardeman W, Moor L, O’Cathain A,  
4  
5 Tinati T., Wight D, Bair J. Process evaluation of complex interventions: Medical Council  
6  
7 guidance. *BMJ*, doi:10.1136/bmj.h1258  
8  
9
- 10 40. Harden SM, Smith ML, Ory MG, Smith-Ray R, Estabrooks PA, Glasgow RE. Re-aim in  
11  
12 clinical, community, and corporate settings: perspectives, strategies, and recommendations to  
13  
14 enhance public health impact. *Front Public Health*. 2018; doi.org/10.3389/fpubh.2018.00071  
15  
16
- 17 41. Proctor E, Silmere H, Raghavan R, Hoymand P, Aarons G, Bunker A, Griffey R, Hensley M.  
18  
19 Outcomes for implementation research: conceptual distinctions, measurement challenges, and  
20  
21 research agenda. *Adm Policy Ment Health*. 2011;38(2):65-76.  
22  
23
- 24 42. Kirk AM, Kelley C, Yankey N, Birken SA, Abadie B, Damschroder L. A systematic review  
25  
26 of the use of the Consolidated Framework for Implementation Research. *Implementation Sci*.  
27  
28 2016;11:72.  
29  
30
- 31 43. Damschroder LJ, Hagedorn HJ. A guiding framework and approach for implementation  
32  
33 research in substance use disorders treatment. *Psychol Addict Behav*. 2011;25(2):194.  
34  
35
- 36 44. Powell BJ, Waltz TJ, Chinman MJ, Damschroder LJ, Smith JL, Matthieu MM, Proctor EK,  
37  
38 Kirchner JE. A refined compilation of implementation strategies: results from the Expert  
39  
40 Recommendations for Implementing Change (ERIC) project. *Implementation Sci*.  
41  
42 2015;10:21.  
43  
44
- 45 45. Implementation Science Research Development (ImpRes) tool and guide.  
46  
47 [http://www.kingsimprovementscience.org/files/ImpRes\\_Guide\\_May2018\\_2.pdf](http://www.kingsimprovementscience.org/files/ImpRes_Guide_May2018_2.pdf). Accessed  
48  
49 03 August 2018.  
50  
51
- 52 46. Sweetnam C, Goulding L, Hull L. P14 Implementation Science Research Development  
53  
54 (ImpRes) Tool Protocol Assessment Criteria (ImpResPAC): Development and Evaluation.  
55  
56 Proceedings from the 2<sup>nd</sup> Annual UK Implementation Science Research Conference,  
57  
58  
59  
60

- 1  
2  
3  
4  
5  
6  
7  
8  
9  
10  
11  
12  
13  
14  
15  
16  
17  
18  
19  
20  
21  
22  
23  
24  
25  
26  
27  
28  
29  
30  
31  
32  
33  
34  
35  
36  
37  
38  
39  
40  
41  
42  
43  
44  
45  
46  
47  
48  
49  
50  
51  
52  
53  
54  
55  
56  
57  
58  
59  
60
- ‘Advancing the science of scaling up: Improving efficiency and effectiveness of implementation strategies in healthcare’. *Impl. Sci.* 2019;14(2):69.
47. Weiner BJ, Lewis CC, Stanick C, Powell BJ, Dorsey CN, Clary AS, Boynton MH, Halko H. Psychometric assessment of three newly developed implementation outcome measures. *Implement Sci.* 2017;12:108.
48. Christopher CW, Ingersoll KS. Development and Initial Validation of the Assessment of Motivational Interviewing Groups – Observer Scales (AMIGOS). *Int J Group Psychoth.* 2017;68(1):69-79.
49. Rixon, L, Baron J, McGale N, Lorencatto F, Francis J, Davies A. Methods used to address fidelity of receipt in health intervention research: a citation analysis and systematic review. *BMC Health Serv Res.* 2016;16:663.
50. Fereday J, Muir-Cochrane E. Demonstrating rigor using thematic analysis: a hybrid approach of inductive and deductive coding and theme development. *Int J Qual Methods.* 2006;5,1-11.



1  
2  
3 **Figure Captions**  
4

5  
6 **Figure 1.** Stakeholder groups that informed the design of the study  
7  
8  
9  
10  
11  
12  
13  
14  
15  
16  
17  
18  
19  
20  
21  
22  
23  
24  
25  
26  
27  
28  
29  
30  
31  
32  
33  
34  
35  
36  
37  
38  
39  
40  
41  
42  
43  
44  
45  
46  
47  
48  
49  
50  
51  
52  
53  
54  
55  
56  
57  
58  
59  
60

For peer review only

**Table 1.** Differences and similarities between HARPdoc and BGAT structure and delivery within the trial

| <b>Structure &amp; delivery</b>                 | <b>HARPdoc</b>                                                                                                                                                                                                                                               | <b>BGAT</b>                                                                                                                                                                                                                                   |
|-------------------------------------------------|--------------------------------------------------------------------------------------------------------------------------------------------------------------------------------------------------------------------------------------------------------------|-----------------------------------------------------------------------------------------------------------------------------------------------------------------------------------------------------------------------------------------------|
| Programme duration                              | 6 weeks                                                                                                                                                                                                                                                      | 6 weeks                                                                                                                                                                                                                                       |
| Programme structure                             | 4 weekly full-day group sessions, weeks 1, 2, 3 and 6<br>1 weekly one-to-one telephone session in weeks 4 and 5                                                                                                                                              | 8 x 2hr group sessions delivered as 2 sessions delivered in one day in weeks 1, 2, 3 and 6<br>1 optional one-to-one telephone session in either week 4 or 5                                                                                   |
| Group size                                      | 5-10                                                                                                                                                                                                                                                         | 5-10                                                                                                                                                                                                                                          |
| Diabetes centres                                | 4                                                                                                                                                                                                                                                            | 4                                                                                                                                                                                                                                             |
| Number of courses per diabetes centre           | 2 - 4                                                                                                                                                                                                                                                        | 2 – 4                                                                                                                                                                                                                                         |
| Sample size<br>(overall 96 course participants) | Total of 48 course participants<br>4-8 participants per course                                                                                                                                                                                               | Total of 48 course participants<br>4-8 participants per course                                                                                                                                                                                |
| Educator training                               | 3-day workshop (1 day to standardise training in hypoglycaemia prevention, and 2 days to train in behaviour change and psychologically informed strategies)<br>1-day refresher course after first courses;<br>Scheduled supervision by clinical psychologist | 3-day workshop (1 day to standardise training in hypoglycaemia prevention, and 2 days to review and update the curriculum with the clinical psychologist)<br>1-day refresher course after first courses;<br>supervision optional (on request) |
| Educators per course                            | 2 educators per course                                                                                                                                                                                                                                       | 1 educator per course                                                                                                                                                                                                                         |
| Programme structure                             | 4 weekly group sessions in weeks 1, 2, 3 and 6<br>2 one-to-one telephone sessions in weeks 4 and 5                                                                                                                                                           | 4 weekly group sessions in weeks 1, 2, 3 and 6<br>1 optional one-to-one telephone session in week 4 or 5                                                                                                                                      |
| Follow-ups                                      | 2h group sessions delivered at 3, 6, and 12 months after the course                                                                                                                                                                                          | None                                                                                                                                                                                                                                          |
| Programme adherence                             | First 3 group sessions, and 1 one-to-one session                                                                                                                                                                                                             | First 3 group sessions                                                                                                                                                                                                                        |

*Note.* BGAT = Blood Glucose Awareness Training (comparator). HARPdoc = Hypoglycaemia Awareness Restoration Programme despite optimised care.

**Table 2.** Data collection plan for the implementation study: assessment objectives, data, instruments, timeline and participants

| #                               | Study outcomes                                            | Definition of the study outcome                                                                                                                                                  | Data type    | Data collection method    | Measurement time-point | Stakeholder groups*                       |
|---------------------------------|-----------------------------------------------------------|----------------------------------------------------------------------------------------------------------------------------------------------------------------------------------|--------------|---------------------------|------------------------|-------------------------------------------|
| <b>IMPLEMENTATION OUTCOMES:</b> |                                                           |                                                                                                                                                                                  |              |                           |                        |                                           |
| 1.                              | Acceptability <sup>41</sup>                               | Extent to which programme is perceived to be agreeable and acceptable for hypoglycaemia and diabetes management.                                                                 | Quantitative | AIM† survey <sup>47</sup> | Post-intervention      | HCPs, people with T1D and their relatives |
|                                 |                                                           |                                                                                                                                                                                  | Qualitative  | Interview                 | Post-intervention      |                                           |
| 2.                              | Appropriateness <sup>41</sup>                             | Extent to which programme is perceived to be fit and relevant for hypoglycaemia and diabetes management.                                                                         | Quantitative | IAM‡ survey <sup>47</sup> | Post-intervention      | HCPs, people with T1D and their relatives |
|                                 |                                                           |                                                                                                                                                                                  | Qualitative  | Interview                 | Post-intervention      |                                           |
| 3.                              | Feasibility <sup>41</sup>                                 | Extent to which programme can be successfully used or carried out to reduce incidents of severe hypoglycaemia.                                                                   | Quantitative | FIM§ survey <sup>47</sup> | Post-intervention      | HCPs, people with T1D and their relatives |
|                                 |                                                           |                                                                                                                                                                                  | Qualitative  | Interview                 | Post-intervention      |                                           |
| 4.                              | Fidelity of delivery <sup>41</sup>                        | Extent to which programme is delivered as intended.                                                                                                                              | Quantitative | Checklist <sup>48</sup>   | Post-intervention      | Diabetes educators and psychologists      |
| 5.                              | Fidelity of receipt <sup>41</sup>                         | Extent to which programme is received as intended.                                                                                                                               | Qualitative  | Interview                 | Post-intervention      | People with T1D                           |
| 6.                              | Adoption <sup>31</sup>                                    | Intention to adopt and use the knowledge and skills learned in the programme in everyday hypoglycaemia and diabetes management.                                                  | Qualitative  | Interview                 | Post-intervention      | HCPs, people with T1D and their relatives |
| 7.                              | Sustainability <sup>41,45-46</sup>                        | Facilitators and barriers to sustained use of the programme.                                                                                                                     | Qualitative  | Interview                 | Post-intervention      | HCPs, people with T1D and their relatives |
| 8.                              | Implementation costs <sup>41,45-46</sup>                  | Costs associated with prospective implementation of the programme.                                                                                                               | Qualitative  | Interview                 | Post-intervention      | HCPs, people with T1D and their relatives |
| <b>OTHER OUTCOMES:</b>          |                                                           |                                                                                                                                                                                  |              |                           |                        |                                           |
| 9.                              | Unintended consequences of programmes <sup>43,45-46</sup> | Positive or negative consequences that are not anticipated at the time of programme implementation.                                                                              | Qualitative  | Interview                 | Post-intervention      | HCPs, people with T1D and their relatives |
| 10.                             | Contextual factors <sup>43,45-46</sup>                    | Facilitators and barriers to the implementation of the programme.                                                                                                                | Qualitative  | Interview                 | Post-intervention      | HCPs, people with T1D and their relatives |
| 11.                             | Implementation strategies <sup>44</sup>                   | Strategies used to deliver and implement the programme; they refer to methods or techniques to enhance and promote adoption, implementation and sustainability of the programme. | Qualitative  | Interview                 | Post-intervention      | HCPs                                      |

Note. \*HCPs = Health Care Professionals incl. diabetes educator, physician, psychologist, and administrative support. †AIM = Acceptability of Intervention Measure; ‡IAM = Intervention Appropriateness Measure; §FIM = Feasibility of Intervention Measure.<sup>47</sup>

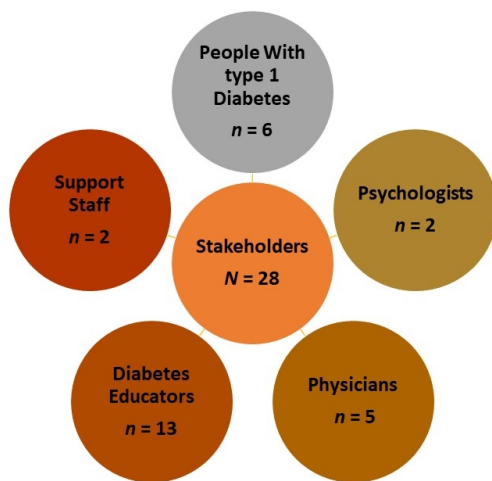

Stakeholder groups that informed the design of the study

338x190mm (96 x 96 DPI)
